# Supplementary material for: Site-selective formation of an iron(iv)–oxo species at the more electron-rich iron atom of heteroleptic μ-nitrido diiron phthalocyanines
Source: Royal Society of Chemistry journal article supplement (doi:10.1039/c5sc01811k), 2015-01-01
Supplement: c5sc01811k1.pdf [file c5sc01811k1.pdf]

## Electronic Supporting Online material for

### Site-selective formation of an iron(IV)-oxo species at the more electron-rich iron atom of heteroleptic $\mu$ -nitrido diiron Phthalocyanines.

Ümit İşci,<sup>a</sup> Abayomi S. Faponle,<sup>b</sup> Pavel Afanasiev,<sup>c</sup> Florian Albrieux,<sup>d</sup> Valérie Briois,<sup>e</sup> Vefa Ahsen,<sup>a</sup> Fabienne Dumoulin,<sup>\*a</sup> Alexander B. Sorokin,<sup>\*c</sup> and Sam P. de Visser<sup>\*b</sup>

[alexander.sorokin@ircelyon.univ-lyon1.fr](mailto:alexander.sorokin@ircelyon.univ-lyon1.fr), [sam.devisser@manchester.ac.uk](mailto:sam.devisser@manchester.ac.uk),  
[fdumoulin@gtu.edu.tr](mailto:fdumoulin@gtu.edu.tr)

#### This PDF file includes:

Supplementary Figures S1 to S12

Tables, Figures and Cartesian coordinates with Computational data.

---

<sup>a</sup> Gebze Technical University, Department of Chemistry, P.O. Box 141, Gebze, 41400 Kocaeli, Turkey.

<sup>b</sup> Manchester Institute of Biotechnology and School of Chemical Engineering and Analytical Science, The University of Manchester, 131 Princess Street, Manchester M1 7DN, United Kingdom.

<sup>c</sup> Institut de Recherches sur la Catalyse et l'Environnement de Lyon (IRCELYON), UMR 5256, CNRS-Université Lyon 1, 2, av. A. Einstein, 69626 Villeurbanne Cedex, France.

<sup>d</sup> Centre Commun de Spectrométrie de Masse UMR 5246, CNRS-Université Claude Bernard Lyon 1, Université de Lyon, Bâtiment Curien, 43, bd du 11 Novembre, 69622 Villeurbanne Cedex, France.

<sup>e</sup> Synchrotron Soleil, L'orme des merisiers, St-Aubin, 91192 Gif-sur-Yvette, France.

† Footnotes relating to the title and/or authors should appear here.

Electronic Supplementary Information (ESI) available: Experimental and computational details, Cartesian coordinates, characterization data, and ESI-MS spectra. See DOI: 10.1039/x0xx00000x

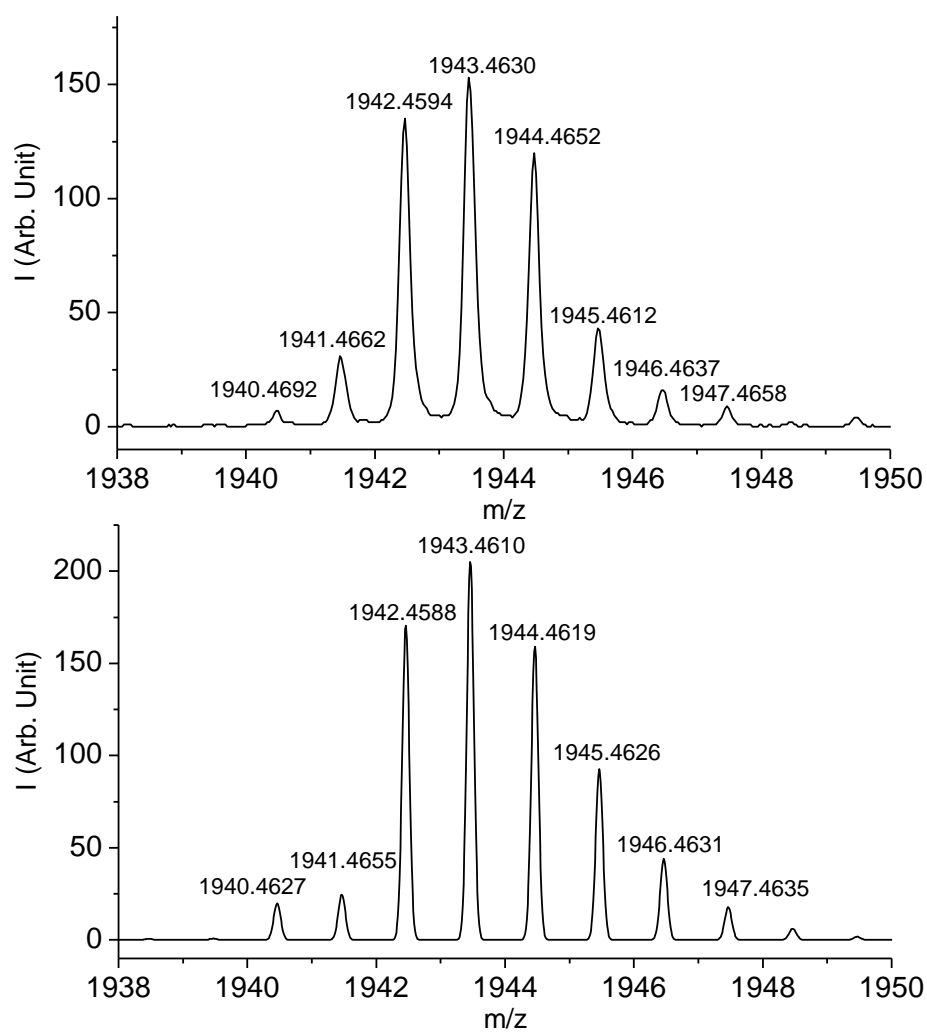

**Figure S1.** High resolution ESI-MS characterisation: experimental and theoretical molecular peak clusters of **3** observed as doubly-charged ions.

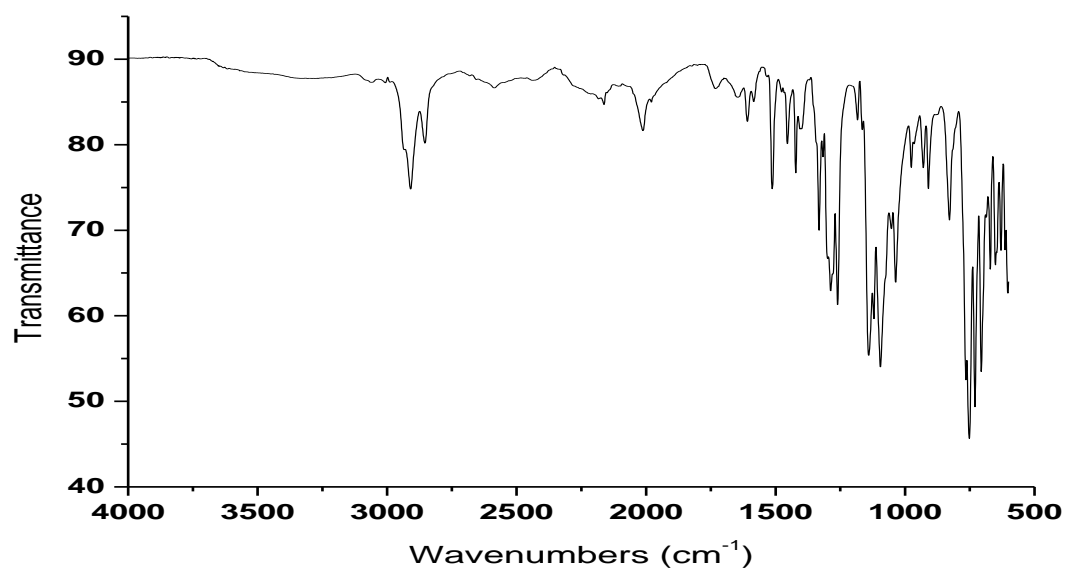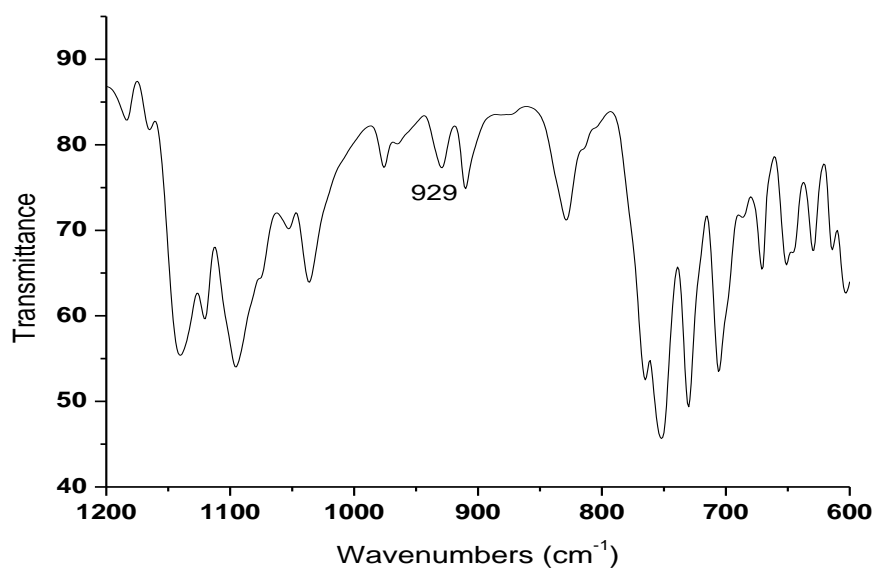

**Figure S2.** Top: full FT-IR spectrum of **3**. Bottom: zoom in at the 1200 – 600 cm<sup>-1</sup> region.

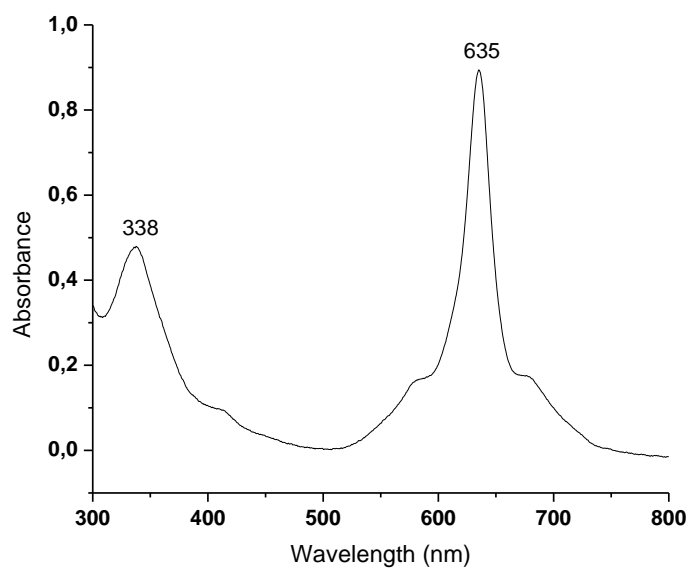

**Figure S3.** UV-Vis spectrum of **3** in CHCl<sub>3</sub> (10 μM).

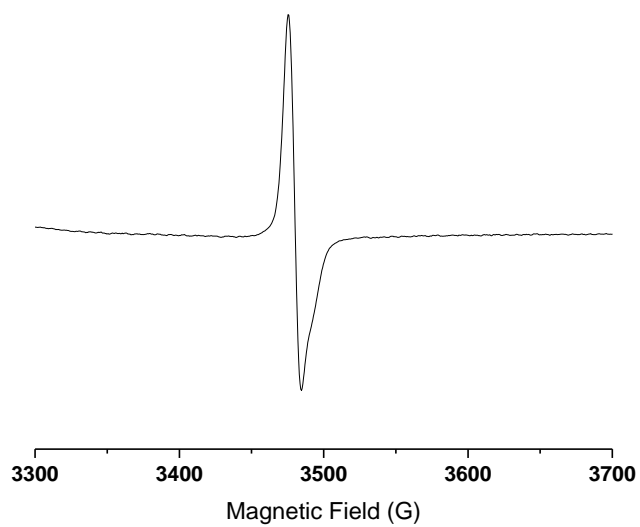

**Figure S4.** X-Band 77 K EPR spectrum of **3** ( $g = 2.05$ ).

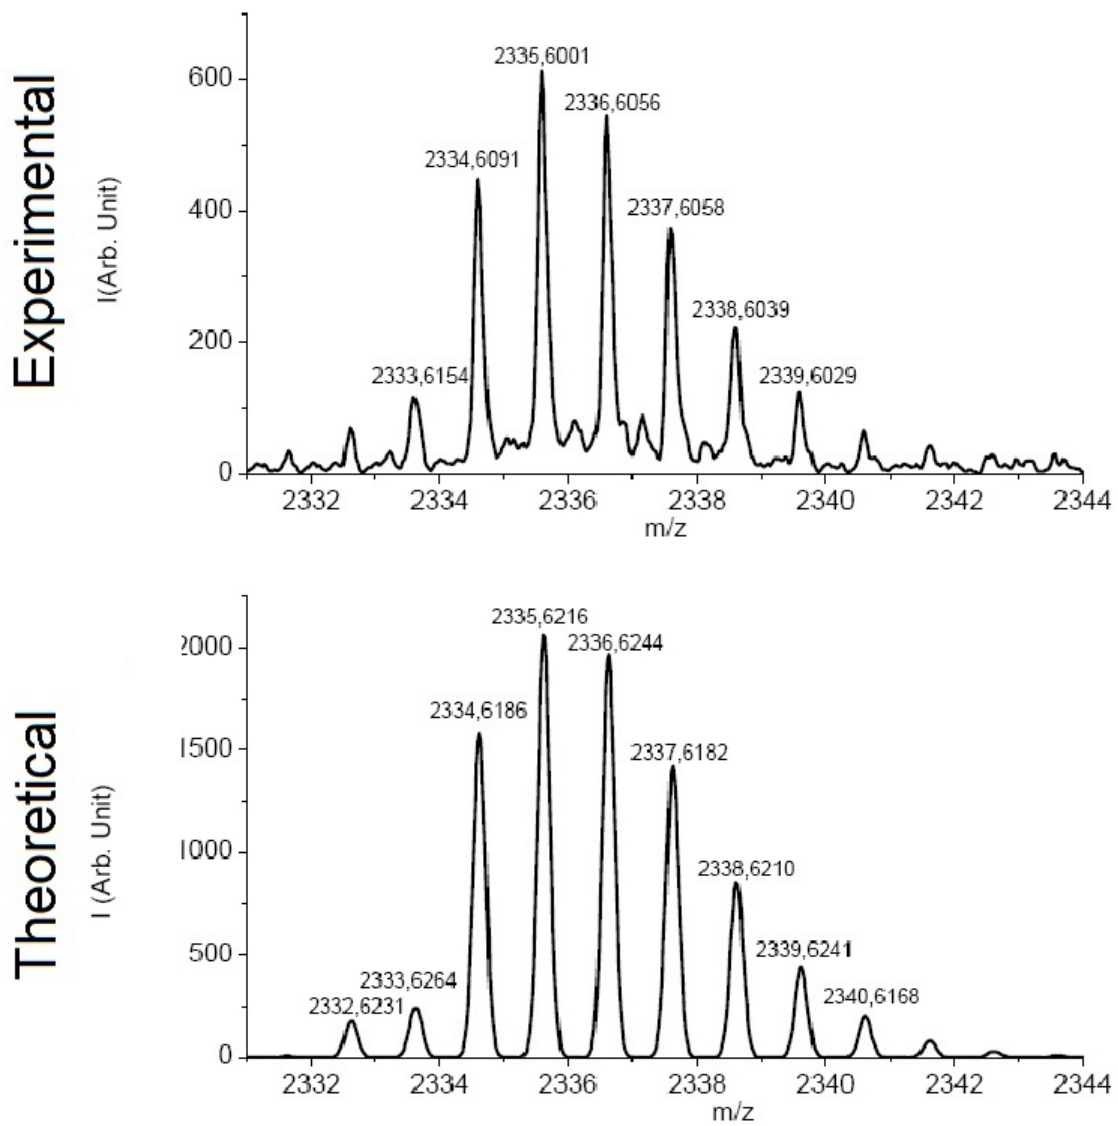

**Figure S5.** High resolution ESI-MS characterisation: experimental and theoretical molecular peak clusters of 7.

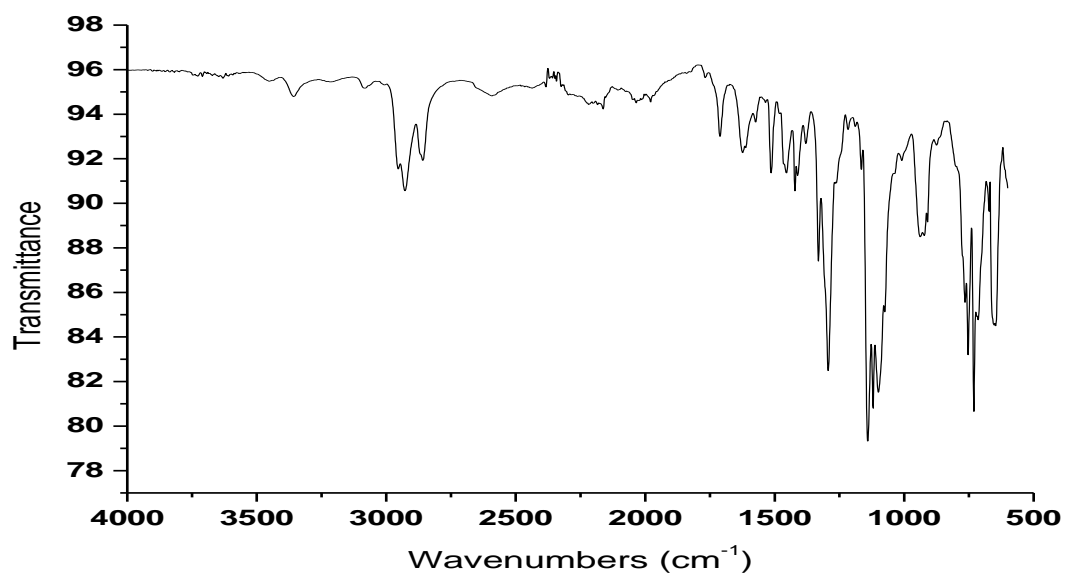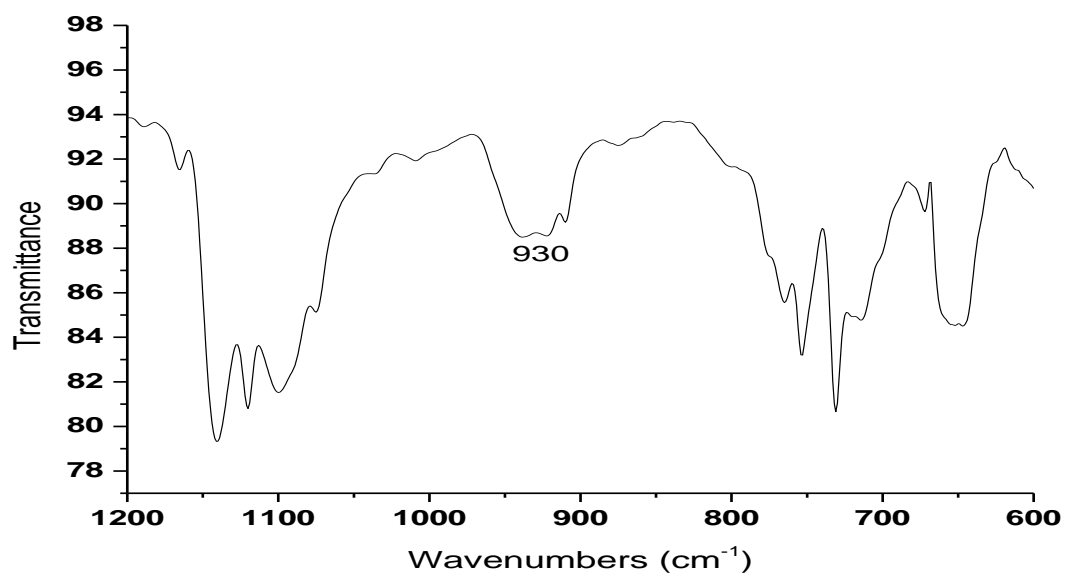

**Figure S6.** Top: full FT-IR spectrum of **7**. Bottom: zoom in at the 1200 – 600 cm<sup>-1</sup> region.

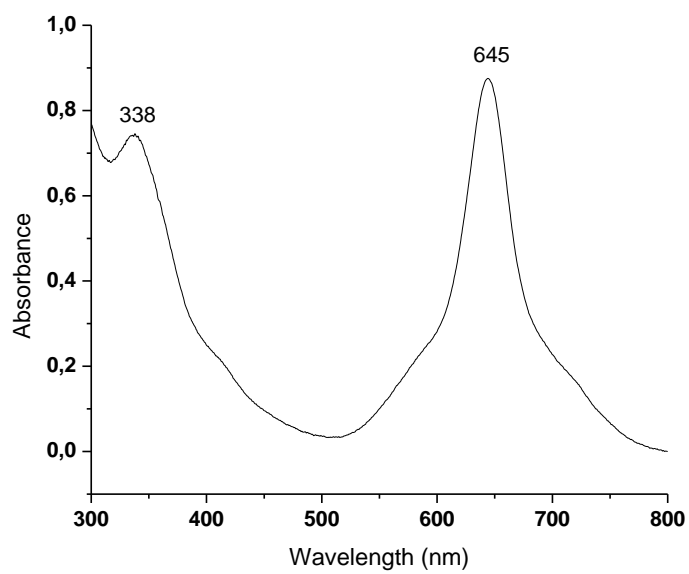

**Figure S7.** UV-Vis spectrum of **7** in CHCl<sub>3</sub> (10 μM).

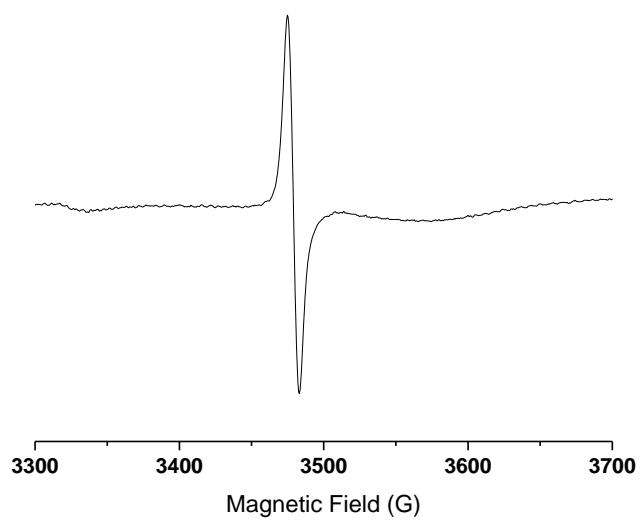

**Figure S8.** X-Band 77 K EPR spectrum of **7** ( $g = 2.05$ ).

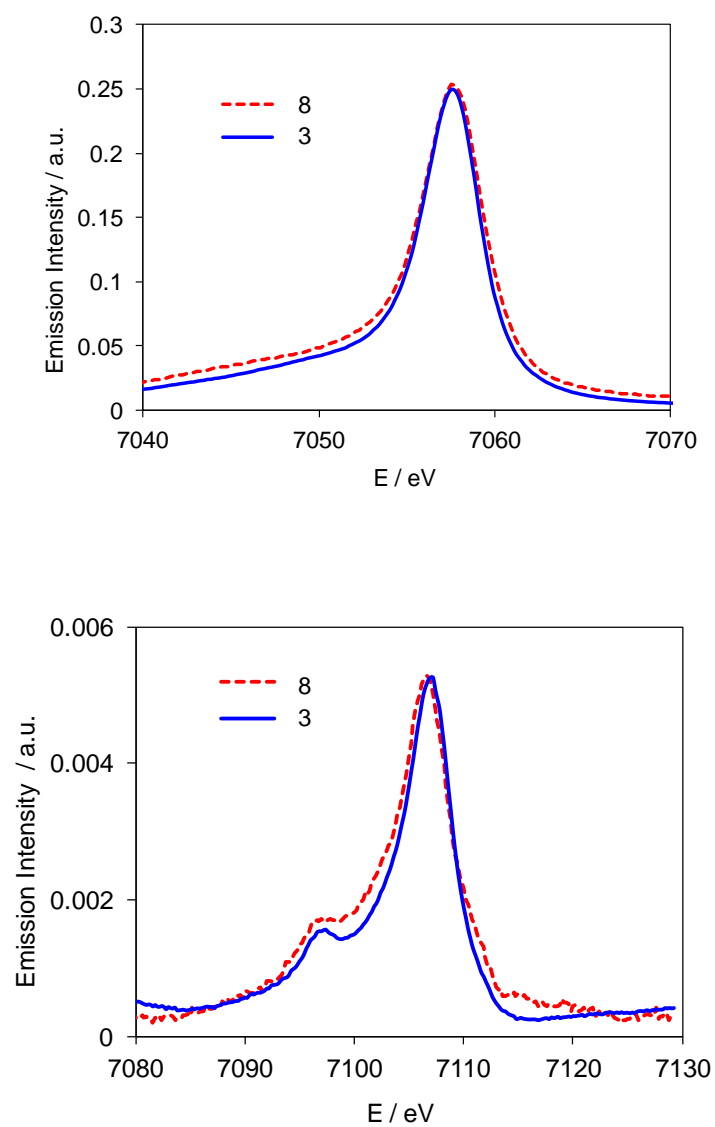

**Figure S9.** High resolution K $\beta$  emission spectra in the main and satellite regions for the complexes **3** and **8**.



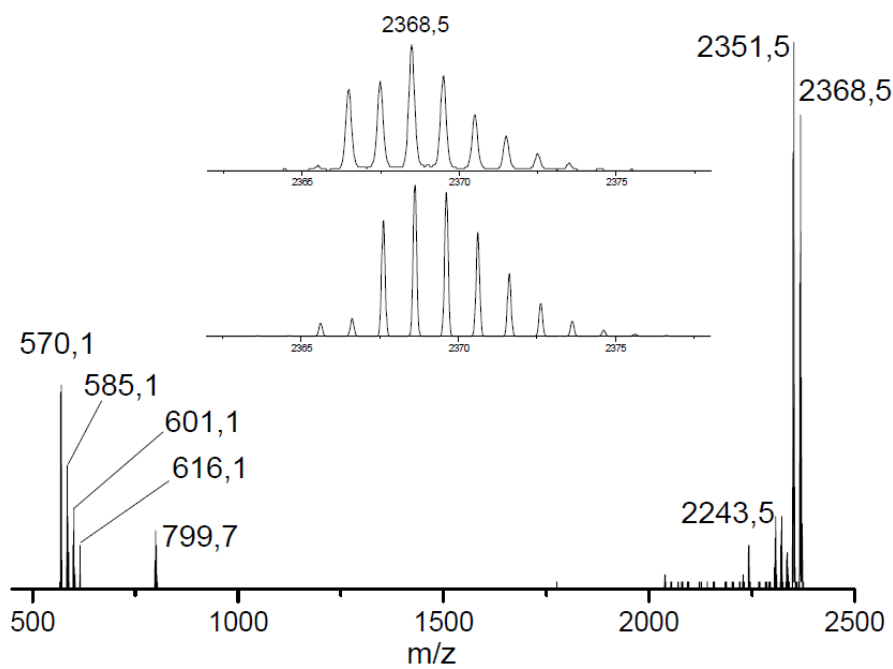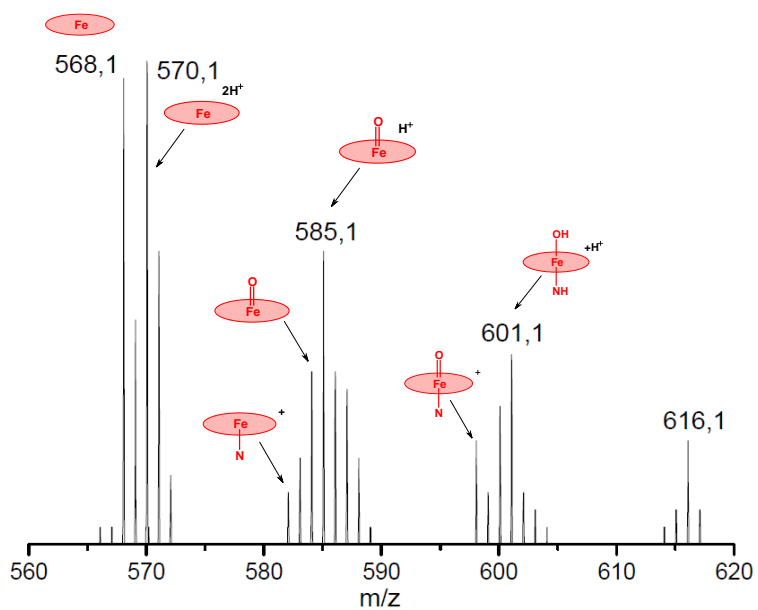

**Figure S10.** CID MS/MS spectrum of the peroxy complex **7-HOOH** obtained from **7** and  $\text{H}_2\text{O}_2$ . Inset: comparison of experimental (top) and simulated (bottom) isotopic distribution of molecular peak. An enlarged region of spectrum with assignment of fragments is shown below.

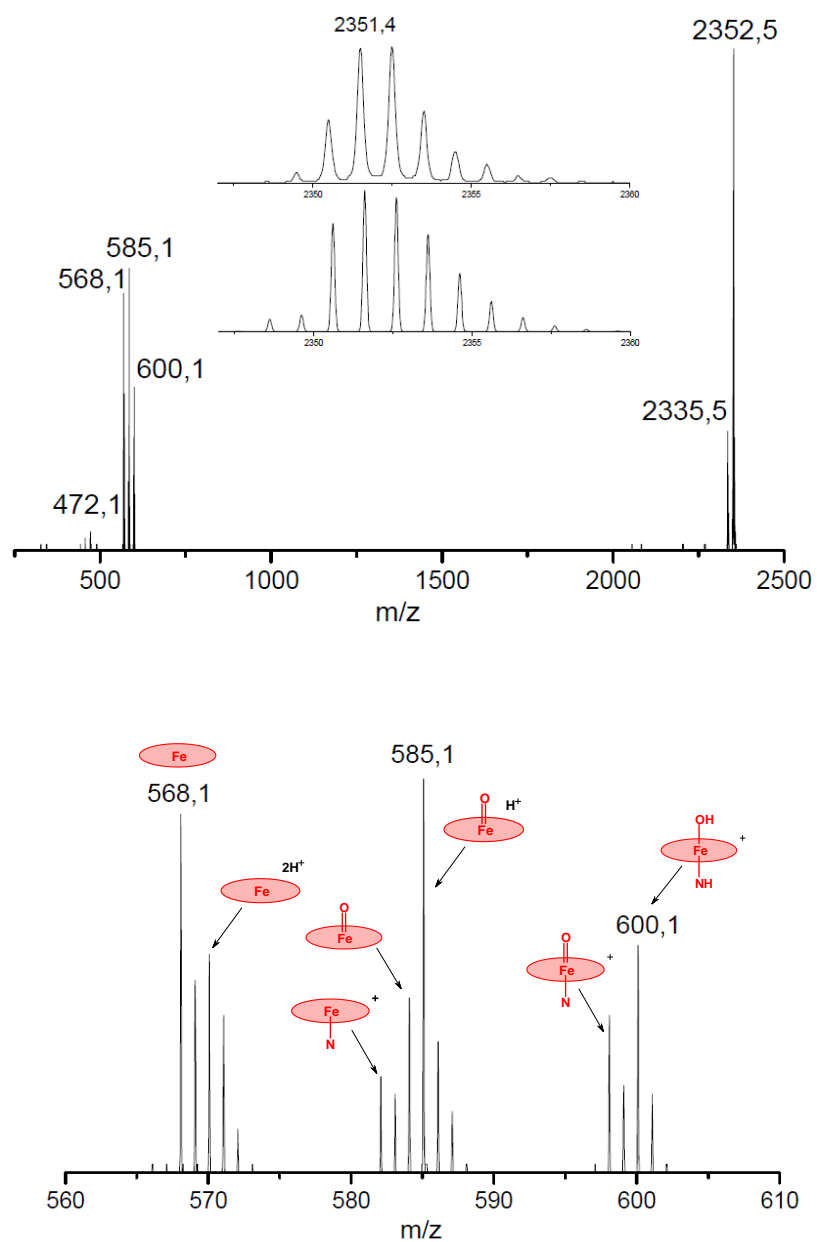

**Figure S11.** CID MS/MS spectrum of the oxo complex  $7=O$  obtained from  $7$  and  $H_2O_2$ . Inset: comparison of experimental (top) and simulated (bottom) isotopic distribution of molecular peak. An enlarged region of spectrum with assignment of fragments is shown below.

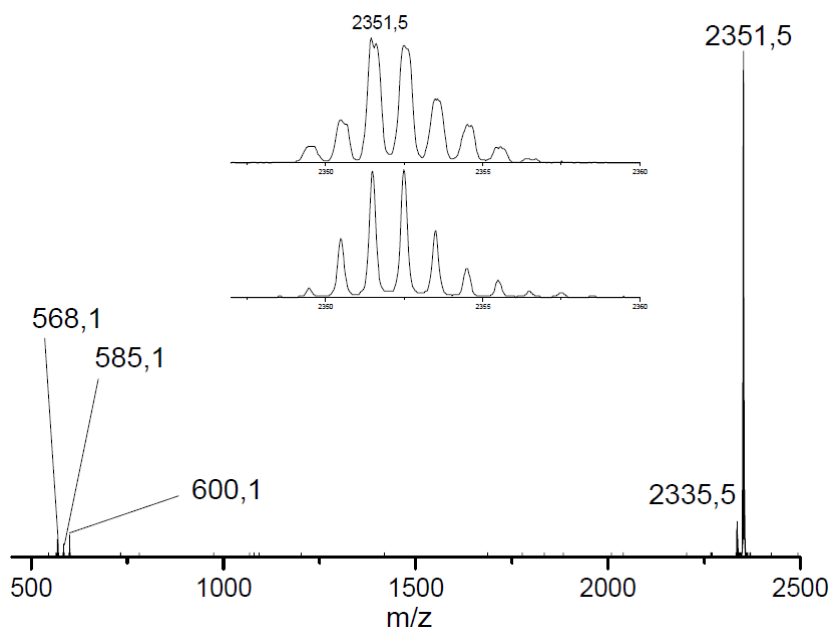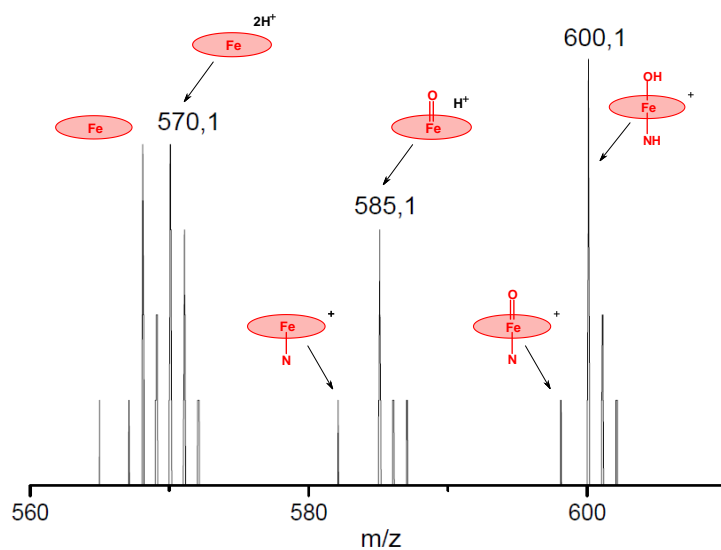

**Figure S12.** CID MS/MS spectrum of the oxo complex **7=O** obtained from **7** and *m*-CPBA. Inset: comparison of experimental (top) and simulated (bottom) isotopic distribution of molecular peak. An enlarged region of spectrum with assignment of fragments is shown below.

**Table S1.** Absolute energies (in au) of UB3LYP optimized geometries.

| B3LYP                                      | E (au)      | ZPE (au) | E+ZPE (au)  | G (au)      | E <sub>solv</sub> (au) |
|--------------------------------------------|-------------|----------|-------------|-------------|------------------------|
| <sup>2</sup> <b>9</b>                      | -5985.81798 | 0.98363  | -5984.83435 | -5984.95745 |                        |
| <sup>2</sup> [ <b>9</b> -OOH] <sub>B</sub> | -6136.85161 | 0.99872  | -6135.85289 | -6135.97600 | -6136.96286            |
| <sup>4</sup> [ <b>9</b> -OOH] <sub>B</sub> | -6136.84385 | 0.99813  | -6135.84572 | -6135.97267 | -6136.95357            |
| <sup>6</sup> [ <b>9</b> -OOH] <sub>B</sub> | -6136.83000 | 0.99752  | -6135.83247 | -6135.95952 | -6136.93869            |
| <sup>2</sup> [ <b>9</b> -OOH] <sub>A</sub> | -6136.85665 | 0.99887  | -6135.85778 | -6135.98270 | -6136.96533            |
| <sup>4</sup> [ <b>9</b> -OOH] <sub>A</sub> | -6136.84757 | 0.99839  | -6135.84917 | -6135.97249 | -6136.95501            |
| <sup>6</sup> [ <b>9</b> -OOH] <sub>A</sub> | -6136.79845 | 0.99415  | -6135.80430 | -6135.93166 | -6136.90784            |

**Table S2.** Absolute (in au) and relative (in kcal mol<sup>-1</sup>) energies of UB3LYP optimized geometries.

|                                          | E (au)      | ZPE (au) | E+ZPE       | G (au)      | $\Delta E+ZPE$ | $\Delta G$ |
|------------------------------------------|-------------|----------|-------------|-------------|----------------|------------|
| <sup>2</sup> [ <b>9</b> =O] <sub>A</sub> | -6060.94794 | 0.98506  | -6059.96288 | -6060.09332 | 0.00           | 0.00       |
| <sup>4</sup> [ <b>9</b> =O] <sub>A</sub> | -6060.94709 | 0.98534  | -6059.96175 | -6060.08635 | 0.71           | 4.38       |
| <sup>6</sup> [ <b>9</b> =O] <sub>A</sub> | -6060.92568 | 0.98400  | -6059.94168 | -6060.07001 | 13.30          | 14.63      |
|                                          | E (au)      | ZPE (au) | E+ZPE       | G (au)      |                |            |
| <sup>2</sup> [ <b>9</b> =O] <sub>B</sub> | -6060.94579 | 0.98534  | -6059.96045 | -6060.08458 | 1.52           | 5.49       |
| <sup>4</sup> [ <b>9</b> =O] <sub>B</sub> | -6060.94470 | 0.98525  | -6059.95945 | -6060.08402 | 2.15           | 5.84       |
| <sup>6</sup> [ <b>9</b> =O] <sub>B</sub> | -6060.92860 | 0.98414  | -6059.94447 | -6060.07303 | 11.55          | 12.73      |
|                                          | E (au)      | ZPE (au) | E+ZPE       | G (au)      |                |            |
| <sup>2</sup> <b>9</b>                    | -5985.81798 | 0.98363  | -5984.83435 | -5984.95745 | 0.00           | 0.00       |
| <sup>4</sup> <b>9</b>                    | -5985.79786 | 0.98245  | -5984.81541 | -5984.93830 | 11.89          | 12.01      |
| <sup>6</sup> <b>9</b>                    | -5985.78993 | 0.98077  | -5984.80916 | -5984.93749 | 15.81          | 12.53      |

**Table S3.** Absolute (in au) and relative (in kcal mol<sup>-1</sup>) energies of UBP86 optimized geometries.

|                                          | E (au)      | ZPE (au) | E+ZPE       | G (au)      | $\Delta E+ZPE$ | $\Delta G$ |
|------------------------------------------|-------------|----------|-------------|-------------|----------------|------------|
| <sup>2</sup> [ <b>9</b> =O] <sub>A</sub> | -6061.58295 | 0.95566  | -6060.62729 | -6060.75589 | 0.00           | 0.00       |
| <sup>4</sup> [ <b>9</b> =O] <sub>A</sub> | -6061.57498 | 0.95506  | -6060.61992 | -6060.75103 | 4.62           | 3.05       |
| <sup>6</sup> [ <b>9</b> =O] <sub>A</sub> | -6061.54335 | 0.95272  | -6060.59063 | -6060.72172 | 23.00          | 21.44      |
|                                          | E (au)      | ZPE (au) | E+ZPE       | G (au)      | $\Delta E+ZPE$ | $\Delta G$ |
| <sup>2</sup> [ <b>9</b> =O] <sub>B</sub> | -6061.57913 | 0.95561  | -6060.62352 | -6060.74899 | 2.36           | 4.33       |
| <sup>4</sup> [ <b>9</b> =O] <sub>B</sub> | -6061.57178 | 0.95508  | -6060.61670 | -6060.74522 | 6.64           | 6.69       |
| <sup>6</sup> [ <b>9</b> =O] <sub>B</sub> | -6061.54530 | 0.95287  | -6060.59243 | -6060.72303 | 21.87          | 20.62      |
|                                          | E (au)      | ZPE (au) | E+ZPE       | G (au)      | $\Delta E+ZPE$ | $\Delta G$ |
| <sup>2</sup> <b>9</b>                    | -5986.45635 | 0.95307  | -5985.50328 | -5985.63041 | 0.00           | 0.00       |
| <sup>4</sup> <b>9</b>                    | -5986.40680 | 0.95142  | -5985.45538 | -5985.58355 | 30.06          | 29.40      |
| <sup>6</sup> <b>9</b>                    | -5986.38221 | 0.95054  | -5985.43167 | -5985.56275 | 44.93          | 42.46      |

**Table S4.** Key bond lengths of UB3LYP optimized geometries with bond lengths in angstroms and angles in degrees.

|         | <sup>2</sup> [ <b>9</b> =O] <sub>A</sub> | <sup>4</sup> [ <b>9</b> =O] <sub>A</sub> | <sup>6</sup> [ <b>9</b> =O] <sub>A</sub> |
|---------|------------------------------------------|------------------------------------------|------------------------------------------|
| Fe-O    | 1.652                                    | 1.648                                    | 1.671                                    |
| N-Fe    | 2.092                                    | 2.201                                    | 2.059                                    |
| Fe-N    | 1.681                                    | 1.679                                    | 1.755                                    |
| Fe-N-Fe | 178.8                                    | 179.8                                    | 172.3                                    |
|         | <sup>2</sup> [ <b>9</b> =O] <sub>B</sub> | <sup>4</sup> [ <b>9</b> =O] <sub>B</sub> | <sup>6</sup> [ <b>9</b> =O] <sub>B</sub> |
| N-Fe    | 2.141                                    | 2.232                                    | 2.049                                    |
| Fe-N    | 1.678                                    | 1.678                                    | 1.749                                    |
| Fe-O    | 1.647                                    | 1.645                                    | 1.670                                    |
| Fe-N-Fe | 179.8                                    | 179.8                                    | 179.1                                    |
|         | <sup>2</sup> <b>9</b>                    | <sup>4</sup> <b>9</b>                    | <sup>6</sup> <b>9</b>                    |
| N-Fe    | 1.668                                    | 1.904                                    | 1.781                                    |
| Fe-N    | 1.653                                    | 1.654                                    | 1.951                                    |
| Fe-N-Fe | 179.2                                    | 170.0                                    | 179.0                                    |

**Table S5.** Key bond lengths of UBP86 optimized geometries with bond lengths in angstroms and angles in degrees.

|         | <sup>2</sup> [9=O] <sub>A</sub> | <sup>4</sup> [9=O] <sub>A</sub> | <sup>6</sup> [9=O] <sub>A</sub> |
|---------|---------------------------------|---------------------------------|---------------------------------|
| Fe-O    | 1.718                           | 1.678                           | 1.687                           |
| N-Fe    | 1.795                           | 2.046                           | 2.075                           |
| Fe-N    | 1.621                           | 1.617                           | 1.681                           |
| Fe-N-Fe | 179.5                           | 161.9                           | 159.7                           |
|         | <sup>2</sup> [9=O] <sub>B</sub> | <sup>4</sup> [9=O] <sub>B</sub> | <sup>6</sup> [9=O] <sub>B</sub> |
| N-Fe    | 1.627                           | 1.620                           | 1.681                           |
| Fe-N    | 1.788                           | 2.043                           | 2.084                           |
| Fe-O    | 1.714                           | 1.673                           | 1.686                           |
| Fe-N-Fe | 179.6                           | 163.9                           | 160.5                           |
|         | <sup>2</sup> 9                  | <sup>4</sup> 9                  | <sup>6</sup> 9                  |
| N-Fe    | 1.668                           | 1.904                           | 1.781                           |
| Fe-N    | 1.653                           | 1.654                           | 1.951                           |
| Fe-N-Fe | 179.2                           | 170.0                           | 179.0                           |



**Table S6.** Single-point energies (in au) of different fragments calculated at UB3LYP.

| Single-point                                                               | E (au)      |
|----------------------------------------------------------------------------|-------------|
| $^2[[(\text{PcH})\text{FeOOH}]\text{-N}-(\text{NH}_3)_2(\text{NH}_2)_2]^-$ | -2345.40281 |
| $^2[(\text{PcH})]\text{-N}-(\text{NH}_3)_2(\text{NH}_2)_2$                 | -2194.32779 |
| $^2[[(\text{PcS})\text{FeOOH}]\text{-N}-(\text{NH}_3)_2(\text{NH}_2)_2]^-$ | -4697.10993 |
| $^2[(\text{PcS})]\text{-N}-(\text{NH}_3)_2(\text{NH}_2)_2$                 | -4545.99618 |
| $^2[(\text{PcH})\text{FeOOH}]$                                             | -1942.03809 |
| $^2[(\text{PcS})\text{FeOOH}]$                                             | -4293.71064 |
| $^2[(\text{PcH})\text{FeOOH}]\text{-(point charge)}^-$                     | -1942.13658 |
| $^2[(\text{PcS})\text{FeOOH}]\text{-(point charge)}^-$                     | -4293.89695 |
| $^2[\text{PcH}]^+$                                                         | -1788.71422 |
| $^2[\text{PcS}]^+$                                                         | -4142.41635 |
| $^2[\text{PcH}]\text{-(point charge)}$                                     | -1791.06296 |
| $^2[\text{PcS}]\text{-(point charge)}$                                     | -4142.72038 |

**Table S7.** Absolute energies of UBP86 optimized geometries.

| BP86                          | E (au)      | ZPE (au) | E+ZPE (au)  | G (au)      |
|-------------------------------|-------------|----------|-------------|-------------|
| $^2[\mathbf{9}\text{-OOH}]_A$ | -6137.48876 | 0.96675  | -6136.52201 | -6136.64950 |
| $^2[\mathbf{9}\text{-OOH}]_B$ | -6137.49056 | 0.96726  | -6136.52331 | -6136.65230 |

Cartesian coordinates

Structure <sup>2</sup>[9=O]<sub>A</sub>

|    |              |              |              |
|----|--------------|--------------|--------------|
| 26 | -1.780091000 | -0.974714000 | 2.079407000  |
| 7  | -2.882806000 | 0.064395000  | 0.831610000  |
| 7  | -0.739898000 | 0.646660000  | 2.451888000  |
| 7  | -3.129088000 | -2.399196000 | 2.046091000  |
| 7  | -0.981408000 | -1.820005000 | 3.661120000  |
| 6  | 0.314937000  | 0.749727000  | 3.356928000  |
| 6  | -2.628836000 | 1.359450000  | 0.383159000  |
| 6  | -0.810814000 | 1.852980000  | 1.757003000  |
| 6  | -4.187220000 | -2.500247000 | 1.144821000  |
| 6  | 0.107946000  | -1.336402000 | 4.382266000  |
| 6  | -3.119603000 | -3.566102000 | 2.808414000  |
| 6  | -1.297303000 | -3.075556000 | 4.177248000  |
| 6  | -4.442141000 | 0.605239000  | -0.807812000 |
| 6  | 0.932049000  | 2.060304000  | 3.238793000  |
| 6  | -3.593742000 | 1.719395000  | -0.641116000 |
| 6  | 0.222495000  | 2.753589000  | 2.236420000  |
| 6  | -4.876160000 | -3.764765000 | 1.341682000  |
| 6  | 0.495859000  | -2.308575000 | 5.390528000  |
| 6  | -4.207581000 | -4.431736000 | 2.389159000  |
| 6  | -0.386975000 | -3.400794000 | 5.261329000  |
| 26 | 0.552798000  | -2.415344000 | -0.511986000 |
| 7  | 0.494750000  | -0.646846000 | -1.388940000 |
| 7  | -1.063449000 | -2.953956000 | -1.506957000 |
| 7  | 2.043001000  | -1.800036000 | 0.625177000  |
| 7  | 0.498827000  | -4.115136000 | 0.490925000  |
| 6  | 1.393263000  | 0.382937000  | -1.180158000 |
| 6  | -1.685509000 | -4.187238000 | -1.423546000 |
| 6  | -0.373820000 | -0.276269000 | -2.399356000 |
| 6  | -1.687201000 | -2.210963000 | -2.493505000 |
| 6  | 2.693101000  | -0.584083000 | 0.509405000  |
| 6  | -0.376811000 | -5.159086000 | 0.256266000  |
| 6  | 2.697040000  | -2.561018000 | 1.577848000  |
| 6  | 1.399890000  | -4.505574000 | 1.464755000  |
| 6  | 1.084689000  | 1.476124000  | -2.094193000 |
| 6  | -2.771189000 | -4.242096000 | -2.395716000 |
| 6  | -0.023604000 | 1.060844000  | -2.866065000 |
| 6  | -2.775144000 | -2.996422000 | -3.062721000 |
| 6  | 3.816050000  | -0.551474000 | 1.439075000  |
| 6  | -0.031046000 | -6.275000000 | 1.128531000  |
| 6  | 3.814946000  | -1.793477000 | 2.113001000  |
| 6  | 1.090737000  | -5.867971000 | 1.885240000  |
| 7  | -0.738318000 | -1.633018000 | 0.936152000  |
| 7  | 0.710236000  | -0.164874000 | 4.231423000  |
| 7  | -4.567113000 | -1.595592000 | 0.253241000  |
| 7  | 2.392700000  | 0.419226000  | -0.306760000 |

|    |              |               |              |
|----|--------------|---------------|--------------|
| 7  | -1.380158000 | -5.193422000  | -0.612717000 |
| 6  | -3.980184000 | -0.414211000  | 0.119204000  |
| 8  | 1.569730000  | -3.032359000  | -1.657968000 |
| 7  | -2.274721000 | -3.878741000  | 3.780927000  |
| 7  | -1.379283000 | -0.985086000  | -2.899756000 |
| 7  | -1.673513000 | 2.176691000   | 0.803869000  |
| 7  | 2.401372000  | -3.794460000  | 1.970005000  |
| 6  | -0.588796000 | -7.545084000  | 1.283882000  |
| 6  | 1.702481000  | -6.721530000  | 2.807072000  |
| 6  | 1.156447000  | -7.998665000  | 2.974716000  |
| 6  | 0.025726000  | -8.358294000  | 2.228567000  |
| 6  | -3.701005000 | -2.715776000  | -4.069311000 |
| 6  | -3.677545000 | -5.253653000  | -2.724614000 |
| 6  | -4.611664000 | -4.989135000  | -3.731606000 |
| 6  | -4.605808000 | -3.731779000  | -4.351749000 |
| 6  | 1.679756000  | 2.723222000   | -2.291582000 |
| 6  | 1.102868000  | 3.513094000   | -3.278850000 |
| 6  | -0.562545000 | 1.869271000   | -3.870323000 |
| 6  | 0.022475000  | 3.122362000   | -4.081867000 |
| 6  | 4.780069000  | -2.096521000  | 3.075390000  |
| 6  | 5.714452000  | -1.098098000  | 3.322315000  |
| 6  | 4.787447000  | 0.420662000   | 1.691731000  |
| 6  | 5.761274000  | 0.133262000   | 2.653798000  |
| 6  | 0.560275000  | 4.062858000   | 1.883364000  |
| 6  | 2.000926000  | 2.656894000   | 3.912649000  |
| 6  | 2.343546000  | 3.964057000   | 3.555669000  |
| 6  | 1.631422000  | 4.659318000   | 2.553734000  |
| 6  | -3.776596000 | 2.886940000   | -1.387241000 |
| 6  | -4.827296000 | 2.909259000   | -2.308362000 |
| 6  | -5.677266000 | 1.793933000   | -2.474757000 |
| 6  | -5.496655000 | 0.629041000   | -1.723826000 |
| 6  | -5.987698000 | -4.333787000  | 0.714790000  |
| 6  | -6.411462000 | -5.588738000  | 1.160901000  |
| 6  | -5.743838000 | -6.255356000  | 2.211704000  |
| 6  | -4.634581000 | -5.683612000  | 2.840392000  |
| 6  | -0.288864000 | -4.514893000  | 6.099441000  |
| 6  | 0.718164000  | -4.509869000  | 7.068343000  |
| 6  | 1.600859000  | -3.415399000  | 7.199069000  |
| 6  | 1.498562000  | -2.299723000  | 6.363427000  |
| 16 | -0.690554000 | -10.073840000 | 2.489155000  |
| 16 | -5.882889000 | -3.405417000  | -5.688196000 |
| 16 | 1.854125000  | 5.206634000   | -3.580874000 |
| 8  | -5.332117000 | -2.150059000  | -6.596978000 |
| 8  | -6.294544000 | -4.850984000  | -6.354882000 |
| 8  | -1.600378000 | -10.432094000 | 1.166740000  |
| 8  | 0.525329000  | -11.054197000 | 3.003218000  |
| 8  | 8.357629000  | -0.547771000  | 4.226208000  |
| 8  | 7.112936000  | -3.075911000  | 4.808717000  |
| 8  | 3.368514000  | 5.194506000   | -2.939478000 |

|    |              |               |              |
|----|--------------|---------------|--------------|
| 8  | 1.574373000  | 5.608585000   | -5.150596000 |
| 1  | -5.314962000 | -5.745462000  | -4.062544000 |
| 1  | -3.644828000 | -6.214350000  | -2.225093000 |
| 1  | -3.708926000 | -1.780437000  | -4.616761000 |
| 1  | -1.429572000 | -7.894290000  | 0.695784000  |
| 1  | 1.608671000  | -8.723213000  | 3.643042000  |
| 1  | 2.579888000  | -6.407700000  | 3.359550000  |
| 1  | 4.824065000  | -3.053159000  | 3.582931000  |
| 1  | 4.792825000  | 1.356920000   | 1.146844000  |
| 1  | 6.567968000  | 0.826065000   | 2.866838000  |
| 1  | 2.549222000  | 3.054496000   | -1.735777000 |
| 1  | -0.320715000 | 3.779953000   | -4.873062000 |
| 1  | -1.394912000 | 1.527378000   | -4.473421000 |
| 1  | -6.148443000 | -0.229274000  | -1.838639000 |
| 1  | -6.483507000 | 1.847641000   | -3.198647000 |
| 1  | -4.997784000 | 3.797583000   | -2.907313000 |
| 1  | -3.123073000 | 3.740275000   | -1.250145000 |
| 1  | -6.497946000 | -3.814242000  | -0.087570000 |
| 1  | -7.269743000 | -6.062105000  | 0.695845000  |
| 1  | -6.102740000 | -7.227333000  | 2.533201000  |
| 1  | -4.119743000 | -6.183813000  | 3.652473000  |
| 1  | -0.973933000 | -5.348056000  | 5.996013000  |
| 1  | 0.826086000  | -5.358624000  | 7.735344000  |
| 1  | 2.369354000  | -3.445184000  | 7.964275000  |
| 1  | 2.166560000  | -1.451920000  | 6.461746000  |
| 1  | 2.540206000  | 2.118755000   | 4.683155000  |
| 1  | 3.169749000  | 4.458095000   | 4.055978000  |
| 1  | 1.924744000  | 5.673562000   | 2.304400000  |
| 1  | 0.002835000  | 4.589950000   | 1.117728000  |
| 16 | 7.034539000  | -1.445123000  | 4.611181000  |
| 6  | -7.403331000 | -2.780057000  | -4.741369000 |
| 1  | -8.157364000 | -2.583369000  | -5.502252000 |
| 1  | -7.709558000 | -3.575131000  | -4.063592000 |
| 1  | -7.103357000 | -1.871740000  | -4.221412000 |
| 6  | -1.886897000 | -9.866313000  | 3.946807000  |
| 1  | -2.317695000 | -10.853212000 | 4.110069000  |
| 1  | -1.297977000 | -9.535117000  | 4.800517000  |
| 1  | -2.638260000 | -9.139663000  | 3.642142000  |
| 6  | 0.811063000  | 6.379250000   | -2.515151000 |
| 1  | 1.234023000  | 7.369861000   | -2.676407000 |
| 1  | -0.214718000 | 6.313471000   | -2.874011000 |
| 1  | 0.920992000  | 6.053290000   | -1.482181000 |
| 6  | 6.326460000  | -0.725798000  | 6.217566000  |
| 1  | 7.082479000  | -0.917787000  | 6.977705000  |
| 1  | 6.177621000  | 0.340366000   | 6.054727000  |
| 1  | 5.398890000  | -1.257458000  | 6.423361000  |

Structure <sup>2</sup>[9=O]<sub>B</sub>

|    |              |              |             |
|----|--------------|--------------|-------------|
| 26 | -1.969382000 | -0.795423000 | 2.224677000 |
|----|--------------|--------------|-------------|

|    |              |              |              |
|----|--------------|--------------|--------------|
| 7  | -3.099538000 | -0.184697000 | 0.725575000  |
| 7  | -0.911035000 | 0.863380000  | 2.095362000  |
| 7  | -2.881342000 | -2.544067000 | 2.190437000  |
| 7  | -0.707882000 | -1.486327000 | 3.577303000  |
| 6  | 0.151013000  | 1.209502000  | 2.915658000  |
| 6  | -3.045679000 | 1.064523000  | 0.130919000  |
| 6  | -1.210920000 | 1.949244000  | 1.288148000  |
| 6  | -3.995259000 | -2.858154000 | 1.428367000  |
| 6  | 0.318882000  | -0.765582000 | 4.164225000  |
| 6  | -2.630426000 | -3.600132000 | 3.052327000  |
| 6  | -0.795627000 | -2.715045000 | 4.209346000  |
| 6  | -4.850878000 | -0.030467000 | -0.784387000 |
| 6  | 0.563005000  | 2.575070000  | 2.615098000  |
| 6  | -4.134851000 | 1.185460000  | -0.830950000 |
| 6  | -0.296329000 | 3.041355000  | 1.596519000  |
| 6  | -4.477264000 | -4.180582000 | 1.807008000  |
| 6  | 0.921853000  | -1.566648000 | 5.222856000  |
| 6  | -3.623196000 | -4.644154000 | 2.831224000  |
| 6  | 0.226043000  | -2.794938000 | 5.246635000  |
| 26 | 0.392537000  | -2.239487000 | -0.405788000 |
| 7  | 0.722495000  | -0.580841000 | -1.397354000 |
| 7  | -0.986093000 | -2.710834000 | -1.726886000 |
| 7  | 2.063039000  | -1.947056000 | 0.590492000  |
| 7  | 0.380416000  | -4.093390000 | 0.232444000  |
| 6  | 1.686514000  | 0.374977000  | -1.087764000 |
| 6  | -1.713465000 | -3.895674000 | -1.758748000 |
| 6  | -0.046836000 | -0.077154000 | -2.443170000 |
| 6  | -1.496594000 | -1.878676000 | -2.717180000 |
| 6  | 2.819088000  | -0.779737000 | 0.591043000  |
| 6  | -0.559378000 | -5.064043000 | -0.104325000 |
| 6  | 2.636012000  | -2.818206000 | 1.510436000  |
| 6  | 1.213868000  | -4.636861000 | 1.206664000  |
| 6  | 1.531575000  | 1.520533000  | -1.967984000 |
| 6  | -2.725130000 | -3.820917000 | -2.801725000 |
| 6  | 0.446224000  | 1.235881000  | -2.823642000 |
| 6  | -2.589331000 | -2.549944000 | -3.399977000 |
| 6  | 3.912259000  | -0.905247000 | 1.543083000  |
| 6  | -0.312812000 | -6.266192000 | 0.673602000  |
| 6  | 3.792414000  | -2.186651000 | 2.122226000  |
| 6  | 0.803512000  | -6.000880000 | 1.494952000  |
| 7  | -0.646465000 | -1.602761000 | 0.748033000  |
| 7  | 0.720829000  | 0.462845000  | 3.855683000  |
| 7  | -4.583678000 | -2.100089000 | 0.509108000  |
| 7  | 2.636573000  | 0.289956000  | -0.168925000 |
| 7  | -1.525160000 | -4.969015000 | -1.005392000 |
| 6  | -4.178535000 | -0.873630000 | 0.197063000  |
| 7  | -1.668785000 | -3.686793000 | 3.964909000  |
| 7  | -1.070254000 | -0.667435000 | -3.041856000 |
| 7  | -2.176261000 | 2.038509000  | 0.379625000  |

|    |              |               |              |
|----|--------------|---------------|--------------|
| 7  | 2.242047000  | -4.049298000  | 1.799651000  |
| 6  | -0.950612000 | -7.508728000  | 0.692752000  |
| 6  | 1.331742000  | -6.969625000  | 2.354027000  |
| 6  | 0.703130000  | -8.217774000  | 2.387417000  |
| 6  | -0.419435000 | -8.438843000  | 1.576064000  |
| 6  | -3.406474000 | -2.154362000  | -4.461143000 |
| 6  | -3.670815000 | -4.747256000  | -3.250618000 |
| 6  | -4.499963000 | -4.365411000  | -4.310097000 |
| 6  | -4.354451000 | -3.085549000  | -4.864062000 |
| 6  | 2.248553000  | 2.714453000   | -2.075746000 |
| 6  | 1.809821000  | 3.587156000   | -3.062342000 |
| 6  | 0.047072000  | 2.124715000   | -3.826705000 |
| 6  | 0.752681000  | 3.325478000   | -3.946309000 |
| 6  | 4.705307000  | -2.642986000  | 3.075340000  |
| 6  | 5.711990000  | -1.748607000  | 3.414413000  |
| 6  | 4.955308000  | -0.039512000  | 1.884913000  |
| 6  | 5.875480000  | -0.479135000  | 2.841948000  |
| 6  | -0.190280000 | 4.343234000   | 1.101268000  |
| 6  | 1.556874000  | 3.395250000   | 3.154393000  |
| 6  | 1.667777000  | 4.696957000   | 2.656165000  |
| 6  | 0.801014000  | 5.166875000   | 1.645660000  |
| 6  | -4.533462000 | 2.228003000   | -1.670401000 |
| 6  | -5.671538000 | 2.030159000   | -2.458530000 |
| 6  | -6.394013000 | 0.818756000   | -2.403705000 |
| 6  | -5.990024000 | -0.228362000  | -1.567900000 |
| 6  | -5.560463000 | -4.945122000  | 1.367216000  |
| 6  | -5.775145000 | -6.183013000  | 1.980694000  |
| 6  | -4.927806000 | -6.641669000  | 3.012603000  |
| 6  | -3.838973000 | -5.878696000  | 3.448335000  |
| 6  | 0.550370000  | -3.792461000  | 6.168668000  |
| 6  | 1.583258000  | -3.530914000  | 7.074337000  |
| 6  | 2.271112000  | -2.298421000  | 7.058430000  |
| 6  | 1.951076000  | -1.302129000  | 6.129307000  |
| 16 | -1.234314000 | -10.130035000 | 1.645646000  |
| 16 | -5.484198000 | -2.608308000  | -6.286847000 |
| 16 | 2.737093000  | 5.209280000   | -3.257905000 |
| 16 | 6.969660000  | -2.306221000  | 4.693162000  |
| 8  | -4.728595000 | -1.407911000  | -7.119075000 |
| 8  | -5.971019000 | -4.001406000  | -7.012272000 |
| 8  | -2.049591000 | -10.330476000 | 0.231637000  |
| 8  | -0.094721000 | -11.200036000 | 2.155709000  |
| 8  | 8.350202000  | -1.454602000  | 4.423400000  |
| 8  | 6.946016000  | -3.950531000  | 4.706739000  |
| 8  | 4.225778000  | 4.996156000   | -2.592522000 |
| 8  | 2.538079000  | 5.700175000   | -4.814600000 |
| 1  | -5.229886000 | -5.047537000  | -4.732134000 |
| 1  | -3.747796000 | -5.729319000  | -2.800148000 |
| 1  | -3.302062000 | -1.197315000  | -4.958768000 |
| 1  | -1.789125000 | -7.748585000  | 0.049513000  |

|   |              |               |              |
|---|--------------|---------------|--------------|
| 1 | 1.082843000  | -9.026540000  | 3.002117000  |
| 1 | 2.204621000  | -6.761348000  | 2.960652000  |
| 1 | 4.654386000  | -3.634532000  | 3.509773000  |
| 1 | 5.052215000  | 0.931365000   | 1.414461000  |
| 1 | 6.728993000  | 0.126331000   | 3.126831000  |
| 1 | 3.104551000  | 2.943894000   | -1.452040000 |
| 1 | 0.521149000  | 4.042951000   | -4.725885000 |
| 1 | -0.771294000 | 1.882350000   | -4.493677000 |
| 1 | -6.545676000 | -1.157403000  | -1.509068000 |
| 1 | -7.289743000 | 0.710396000   | -3.007758000 |
| 1 | -6.013636000 | 2.822364000   | -3.116269000 |
| 1 | -3.980401000 | 3.159668000   | -1.696996000 |
| 1 | -6.214705000 | -4.579252000  | 0.584445000  |
| 1 | -6.612008000 | -6.799079000  | 1.668666000  |
| 1 | -5.141575000 | -7.594866000  | 3.486580000  |
| 1 | -3.191268000 | -6.215674000  | 4.249751000  |
| 1 | 0.007904000  | -4.730635000  | 6.182927000  |
| 1 | 1.855655000  | -4.280908000  | 7.809551000  |
| 1 | 3.047765000  | -2.117545000  | 7.795338000  |
| 1 | 2.465139000  | -0.347661000  | 6.117957000  |
| 1 | 2.209175000  | 3.031075000   | 3.939559000  |
| 1 | 2.424274000  | 5.363032000   | 3.057778000  |
| 1 | 0.897014000  | 6.192651000   | 1.302878000  |
| 1 | -0.869649000 | 4.699090000   | 0.334985000  |
| 8 | -2.987412000 | -0.175450000  | 3.361413000  |
| 6 | 1.793500000  | 6.426526000   | -2.151693000 |
| 1 | 2.354927000  | 7.358451000   | -2.203138000 |
| 1 | 0.795151000  | 6.530518000   | -2.573692000 |
| 1 | 1.787909000  | 6.006137000   | -1.147074000 |
| 6 | -7.001805000 | -1.843816000  | -5.445317000 |
| 1 | -7.641733000 | -1.502528000  | -6.257921000 |
| 1 | -7.472758000 | -2.633706000  | -4.862310000 |
| 1 | -6.644320000 | -1.019000000  | -4.830548000 |
| 6 | -2.526284000 | -9.974054000  | 3.024876000  |
| 1 | -3.047891000 | -10.930068000 | 3.041040000  |
| 1 | -1.982448000 | -9.793073000  | 3.950674000  |
| 1 | -3.186147000 | -9.151467000  | 2.752804000  |
| 6 | 6.250363000  | -1.719429000  | 6.346702000  |
| 1 | 6.930211000  | -2.098868000  | 7.108352000  |
| 1 | 6.238345000  | -0.631013000  | 6.319283000  |
| 1 | 5.254790000  | -2.152380000  | 6.433153000  |

Structure <sup>29</sup>

|    |              |              |             |
|----|--------------|--------------|-------------|
| 26 | -1.642312000 | -1.068447000 | 2.077502000 |
| 7  | -2.891625000 | -0.367210000 | 0.734053000 |
| 7  | -0.883791000 | 0.742082000  | 2.264561000 |
| 7  | -2.779407000 | -2.659289000 | 2.258199000 |
| 7  | -0.761125000 | -1.558870000 | 3.795382000 |
| 6  | 0.102944000  | 1.128376000  | 3.167628000 |

|    |              |              |              |
|----|--------------|--------------|--------------|
| 6  | -2.846278000 | 0.894337000  | 0.147103000  |
| 6  | -1.128887000 | 1.823564000  | 1.425641000  |
| 6  | -3.843668000 | -3.008890000 | 1.432636000  |
| 6  | 0.215455000  | -0.821423000 | 4.449712000  |
| 6  | -2.591351000 | -3.702267000 | 3.162809000  |
| 6  | -0.866988000 | -2.781614000 | 4.442686000  |
| 6  | -4.624386000 | -0.200499000 | -0.810277000 |
| 6  | 0.498826000  | 2.503012000  | 2.897667000  |
| 6  | -3.915609000 | 1.018014000  | -0.830991000 |
| 6  | -0.278781000 | 2.941117000  | 1.806170000  |
| 6  | -4.348512000 | -4.318938000 | 1.813566000  |
| 6  | 0.753190000  | -1.595847000 | 5.559842000  |
| 6  | -3.565274000 | -4.751716000 | 2.903166000  |
| 6  | 0.073830000  | -2.832384000 | 5.553479000  |
| 26 | 0.386952000  | -2.323558000 | -0.219984000 |
| 7  | 0.637645000  | -0.651094000 | -1.218518000 |
| 7  | -1.079085000 | -2.800387000 | -1.439382000 |
| 7  | 2.173621000  | -2.044810000 | 0.613315000  |
| 7  | 0.444231000  | -4.199551000 | 0.389548000  |
| 6  | 1.631391000  | 0.295334000  | -0.989294000 |
| 6  | -1.758435000 | -4.012960000 | -1.472354000 |
| 6  | -0.201238000 | -0.151967000 | -2.206780000 |
| 6  | -1.630831000 | -1.983426000 | -2.418721000 |
| 6  | 2.910928000  | -0.871807000 | 0.577229000  |
| 6  | -0.497593000 | -5.178471000 | 0.106473000  |
| 6  | 2.793833000  | -2.909044000 | 1.500253000  |
| 6  | 1.352540000  | -4.735319000 | 1.295180000  |
| 6  | 1.409213000  | 1.446129000  | -1.852195000 |
| 6  | -2.784638000 | -3.972045000 | -2.504167000 |
| 6  | 0.260287000  | 1.164869000  | -2.621966000 |
| 6  | -2.702872000 | -2.695110000 | -3.099073000 |
| 6  | 4.052507000  | -0.982033000 | 1.476931000  |
| 6  | -0.188253000 | -6.383891000 | 0.860617000  |
| 6  | 3.972696000  | -2.265121000 | 2.061959000  |
| 6  | 0.978967000  | -6.109060000 | 1.605113000  |
| 7  | -0.452893000 | -1.709822000 | 1.110726000  |
| 7  | 0.619484000  | 0.407678000  | 4.154095000  |
| 7  | -4.382527000 | -2.273203000 | 0.469265000  |
| 7  | 2.656161000  | 0.206501000  | -0.152992000 |
| 7  | -1.512742000 | -5.091861000 | -0.741773000 |
| 6  | -3.962935000 | -1.051267000 | 0.167273000  |
| 7  | -1.701664000 | -3.769456000 | 4.144506000  |
| 7  | -1.245438000 | -0.759870000 | -2.753196000 |
| 7  | -2.019638000 | 1.888327000  | 0.445116000  |
| 7  | 2.414549000  | -4.139699000 | 1.819214000  |
| 6  | -0.810797000 | -7.632156000 | 0.919344000  |
| 6  | 1.573632000  | -7.075574000 | 2.421186000  |
| 6  | 0.959604000  | -8.329948000 | 2.496758000  |
| 6  | -0.213496000 | -8.559291000 | 1.764044000  |



|    |              |               |              |
|----|--------------|---------------|--------------|
| 6  | -3.527580000 | -2.338096000  | -4.168106000 |
| 6  | -3.684765000 | -4.939497000  | -2.960127000 |
| 6  | -4.521055000 | -4.597343000  | -4.027175000 |
| 6  | -4.426845000 | -3.312911000  | -4.581716000 |
| 6  | 2.118501000  | 2.637847000   | -2.014775000 |
| 6  | 1.604095000  | 3.516115000   | -2.960064000 |
| 6  | -0.212735000 | 2.056610000   | -3.588830000 |
| 6  | 0.480916000  | 3.258937000   | -3.758975000 |
| 6  | 4.916441000  | -2.699075000  | 2.993912000  |
| 6  | 5.911351000  | -1.782100000  | 3.309913000  |
| 6  | 5.089453000  | -0.097977000  | 1.788193000  |
| 6  | 6.039569000  | -0.513839000  | 2.727338000  |
| 6  | -0.166272000 | 4.243908000   | 1.313551000  |
| 6  | 1.417371000  | 3.352562000   | 3.519777000  |
| 6  | 1.538121000  | 4.653496000   | 3.022816000  |
| 6  | 0.752557000  | 5.095104000   | 1.935614000  |
| 6  | -4.311564000 | 2.073719000   | -1.656308000 |
| 6  | -5.439122000 | 1.881805000   | -2.459232000 |
| 6  | -6.157755000 | 0.666551000   | -2.427983000 |
| 6  | -5.758628000 | -0.390606000  | -1.604270000 |
| 6  | -5.396893000 | -5.099736000  | 1.319576000  |
| 6  | -5.643811000 | -6.325230000  | 1.944588000  |
| 6  | -4.865885000 | -6.754076000  | 3.042609000  |
| 6  | -3.816497000 | -5.972278000  | 3.535712000  |
| 6  | 0.349894000  | -3.814767000  | 6.507093000  |
| 6  | 1.326164000  | -3.531443000  | 7.467564000  |
| 6  | 2.002993000  | -2.292736000  | 7.476656000  |
| 6  | 1.723448000  | -1.308271000  | 6.522847000  |
| 16 | -1.017487000 | -10.249769000 | 1.901239000  |
| 16 | -5.549180000 | -2.901182000  | -6.029613000 |
| 16 | 2.507364000  | 5.141851000   | -3.215604000 |
| 16 | 7.179546000  | -2.292779000  | 4.595413000  |
| 8  | -4.847327000 | -1.664794000  | -6.856172000 |
| 8  | -5.953427000 | -4.318679000  | -6.758905000 |
| 8  | -1.921619000 | -10.475767000 | 0.546197000  |
| 8  | 0.147099000  | -11.316672000 | 2.359119000  |
| 8  | 8.535467000  | -1.398585000  | 4.337891000  |
| 8  | 7.212502000  | -3.936735000  | 4.627847000  |
| 8  | 4.057191000  | 4.928476000   | -2.708934000 |
| 8  | 2.150706000  | 5.670975000   | -4.731306000 |
| 1  | -5.211490000 | -5.314119000  | -4.458057000 |
| 1  | -3.716180000 | -5.925753000  | -2.513111000 |
| 1  | -3.458522000 | -1.378762000  | -4.667298000 |
| 1  | -1.688884000 | -7.877644000  | 0.333542000  |
| 1  | 1.386609000  | -9.135375000  | 3.084188000  |
| 1  | 2.485281000  | -6.861253000  | 2.965714000  |
| 1  | 4.892416000  | -3.688702000  | 3.435282000  |
| 1  | 5.156508000  | 0.873189000   | 1.312796000  |
| 1  | 6.884686000  | 0.111097000   | 2.994517000  |

|   |              |               |              |
|---|--------------|---------------|--------------|
| 1 | 3.023717000  | 2.860698000   | -1.462132000 |
| 1 | 0.189716000  | 3.980361000   | -4.514530000 |
| 1 | -1.079241000 | 1.815613000   | -4.192652000 |
| 1 | -6.310131000 | -1.322940000  | -1.564657000 |
| 1 | -7.044798000 | 0.563858000   | -3.045395000 |
| 1 | -5.776575000 | 2.680026000   | -3.111844000 |
| 1 | -3.762244000 | 3.007825000   | -1.662696000 |
| 1 | -5.995117000 | -4.758484000  | 0.482888000  |
| 1 | -6.449700000 | -6.957629000  | 1.587390000  |
| 1 | -5.100563000 | -7.701896000  | 3.517033000  |
| 1 | -3.221032000 | -6.286958000  | 4.385132000  |
| 1 | -0.179222000 | -4.760566000  | 6.498323000  |
| 1 | 1.566453000  | -4.272200000  | 8.223017000  |
| 1 | 2.745097000  | -2.101075000  | 8.245217000  |
| 1 | 2.230686000  | -0.350229000  | 6.528742000  |
| 1 | 2.008198000  | 3.008983000   | 4.360798000  |
| 1 | 2.240871000  | 5.340607000   | 3.482274000  |
| 1 | 0.857776000  | 6.118753000   | 1.589881000  |
| 1 | -0.782783000 | 4.577258000   | 0.486572000  |
| 6 | -2.223719000 | -10.072662000 | 3.354020000  |
| 1 | -2.733206000 | -11.032535000 | 3.426632000  |
| 1 | -1.626552000 | -9.862277000  | 4.239829000  |
| 1 | -2.908061000 | -9.263799000  | 3.101928000  |
| 6 | -7.124375000 | -2.213771000  | -5.229433000 |
| 1 | -7.776787000 | -1.944832000  | -6.059022000 |
| 1 | -7.549177000 | -3.011187000  | -4.621769000 |
| 1 | -6.827696000 | -1.345088000  | -4.644140000 |
| 6 | 1.680727000  | 6.333315000   | -1.993074000 |
| 1 | 0.641503000  | 6.434972000   | -2.301697000 |
| 1 | 1.788044000  | 5.897792000   | -1.000616000 |
| 1 | 2.226172000  | 7.271116000   | -2.089474000 |
| 6 | 6.424962000  | -1.717300000  | 6.238827000  |
| 1 | 6.367245000  | -0.630784000  | 6.198437000  |
| 1 | 5.447637000  | -2.190092000  | 6.326265000  |
| 1 | 7.114630000  | -2.059138000  | 7.009342000  |

|                                                                 |              |              |             |
|-----------------------------------------------------------------|--------------|--------------|-------------|
| $^2[(\text{PcS})\text{FeOOH}]\text{-N-(NH}_3)_2(\text{NH}_2)_2$ |              |              |             |
| 26                                                              | -1.778414000 | -0.982293000 | 2.069019000 |
| 7                                                               | -3.105838000 | -0.186639000 | 0.840327000 |
| 7                                                               | -0.899348000 | 0.772705000  | 2.212246000 |
| 7                                                               | -2.920931000 | -2.574795000 | 2.229266000 |
| 7                                                               | -0.714281000 | -1.616104000 | 3.594463000 |
| 1                                                               | -0.106394000 | 1.000523000  | 2.812015000 |
| 1                                                               | -3.297260000 | 0.740920000  | 1.161249000 |
| 1                                                               | -1.110075000 | 1.597516000  | 1.650391000 |
| 1                                                               | -3.753983000 | -2.775933000 | 1.676123000 |
| 1                                                               | -0.468354000 | -0.938621000 | 4.287670000 |
| 1                                                               | -2.755788000 | -3.373446000 | 2.841870000 |
| 1                                                               | -1.240784000 | -2.437048000 | 3.815475000 |

|    |              |               |              |
|----|--------------|---------------|--------------|
| 26 | 0.455952000  | -2.358790000  | -0.430282000 |
| 7  | 0.586852000  | -0.619482000  | -1.343958000 |
| 7  | -1.062130000 | -2.836144000  | -1.589093000 |
| 7  | 2.012263000  | -1.906374000  | 0.703663000  |
| 7  | 0.365389000  | -4.122851000  | 0.456402000  |
| 6  | 1.537786000  | 0.341889000   | -1.082899000 |
| 6  | -1.727993000 | -4.042894000  | -1.567894000 |
| 6  | -0.214989000 | -0.182006000  | -2.375509000 |
| 6  | -1.604098000 | -2.046799000  | -2.578539000 |
| 6  | 2.732434000  | -0.732538000  | 0.622994000  |
| 6  | -0.531520000 | -5.120288000  | 0.135218000  |
| 6  | 2.598160000  | -2.720309000  | 1.649969000  |
| 6  | 1.206590000  | -4.586676000  | 1.446430000  |
| 6  | 1.329898000  | 1.474770000   | -1.981815000 |
| 6  | -2.774377000 | -4.032142000  | -2.588089000 |
| 6  | 0.225725000  | 1.144466000   | -2.799578000 |
| 6  | -2.696444000 | -2.771126000  | -3.221837000 |
| 6  | 3.840167000  | -0.780852000  | 1.573902000  |
| 6  | -0.264690000 | -6.288409000  | 0.970311000  |
| 6  | 3.753870000  | -2.034668000  | 2.220970000  |
| 6  | 0.830986000  | -5.952894000  | 1.798086000  |
| 7  | -0.740902000 | -1.605783000  | 0.809346000  |
| 7  | 2.515122000  | 0.301596000   | -0.183371000 |
| 7  | -1.494025000 | -5.088259000  | -0.780640000 |
| 1  | -3.850751000 | -0.819007000  | 0.627685000  |
| 8  | 1.656132000  | -3.130891000  | -1.609960000 |
| 7  | -1.232603000 | -0.823561000  | -2.938167000 |
| 7  | 2.228328000  | -3.945832000  | 2.006256000  |
| 6  | -0.868920000 | -7.543418000  | 1.041728000  |
| 6  | 1.361556000  | -6.863807000  | 2.714389000  |
| 6  | 0.763332000  | -8.125194000  | 2.806514000  |
| 6  | -0.332598000 | -8.416272000  | 1.982938000  |
| 6  | -3.566255000 | -2.423796000  | -4.254726000 |
| 6  | -3.714673000 | -4.988690000  | -2.976539000 |
| 6  | -4.602722000 | -4.655298000  | -4.005503000 |
| 6  | -4.509574000 | -3.387975000  | -4.595800000 |
| 6  | 1.997965000  | 2.690499000   | -2.122254000 |
| 6  | 1.493468000  | 3.543689000   | -3.098699000 |
| 6  | -0.236206000 | 2.012669000   | -3.790794000 |
| 6  | 0.415732000  | 3.241743000   | -3.941613000 |
| 6  | 4.682047000  | -2.414555000  | 3.190416000  |
| 6  | 5.668238000  | -1.476418000  | 3.478635000  |
| 6  | 4.859300000  | 0.127054000   | 1.869630000  |
| 6  | 5.794583000  | -0.232342000  | 2.846243000  |
| 16 | -1.132273000 | -10.098925000 | 2.169182000  |
| 16 | -5.754552000 | -2.958837000  | -5.926642000 |
| 16 | 2.301328000  | 5.221400000   | -3.293957000 |
| 8  | -5.067963000 | -1.897053000  | -6.979408000 |
| 8  | -6.437181000 | -4.359510000  | -6.460497000 |

|    |              |               |              |
|----|--------------|---------------|--------------|
| 8  | -1.793603000 | -10.537486000 | 0.727746000  |
| 8  | -0.071643000 | -11.087100000 | 2.951046000  |
| 8  | 8.209197000  | -0.892056000  | 4.633691000  |
| 8  | 7.119633000  | -3.533132000  | 4.849907000  |
| 8  | 3.881270000  | 5.108981000   | -2.848511000 |
| 8  | 1.876527000  | 5.827075000   | -4.765497000 |
| 1  | -5.344520000 | -5.357259000  | -4.369692000 |
| 1  | -3.749792000 | -5.959156000  | -2.495956000 |
| 1  | -3.501402000 | -1.471876000  | -4.768552000 |
| 1  | -1.689705000 | -7.827427000  | 0.393681000  |
| 1  | 1.139951000  | -8.887890000  | 3.478872000  |
| 1  | 2.215165000  | -6.600034000  | 3.327384000  |
| 1  | 4.649532000  | -3.384343000  | 3.672862000  |
| 1  | 4.924565000  | 1.075598000   | 1.349998000  |
| 1  | 6.625211000  | 0.413791000   | 3.107306000  |
| 1  | 2.862775000  | 2.948091000   | -1.522236000 |
| 1  | 0.123142000  | 3.953685000   | -4.705266000 |
| 1  | -1.070255000 | 1.736694000   | -4.424955000 |
| 16 | 6.918548000  | -1.900708000  | 4.806330000  |
| 6  | -7.100223000 | -2.006086000  | -4.991745000 |
| 1  | -7.809212000 | -1.679536000  | -5.751171000 |
| 1  | -7.549548000 | -2.704783000  | -4.287776000 |
| 1  | -6.614266000 | -1.166976000  | -4.495622000 |
| 6  | -2.575023000 | -9.786094000  | 3.357432000  |
| 1  | -3.098298000 | -10.737651000 | 3.439237000  |
| 1  | -2.140267000 | -9.476923000  | 4.306665000  |
| 1  | -3.196875000 | -9.012195000  | 2.909682000  |
| 6  | 1.440534000  | 6.289136000   | -1.985879000 |
| 1  | 1.926498000  | 7.262433000   | -2.036104000 |
| 1  | 0.389399000  | 6.343222000   | -2.264856000 |
| 1  | 1.593592000  | 5.802618000   | -1.023502000 |
| 6  | 6.049230000  | -1.417296000  | 6.419125000  |
| 1  | 6.730515000  | -1.707866000  | 7.217505000  |
| 1  | 5.896426000  | -0.339734000  | 6.385497000  |
| 1  | 5.112941000  | -1.972328000  | 6.455848000  |
| 8  | 1.417216000  | -2.725924000  | -3.055502000 |
| 1  | 2.068834000  | -3.322612000  | -3.485586000 |
| 1  | -2.633395000 | -0.138235000  | -0.039704000 |
| 1  | 0.114623000  | -2.062331000  | 3.257120000  |

<sup>2</sup>[(PcS)FeOOH]

|    |              |              |              |
|----|--------------|--------------|--------------|
| 26 | 0.455952000  | -2.358790000 | -0.430282000 |
| 7  | 0.586852000  | -0.619482000 | -1.343958000 |
| 7  | -1.062130000 | -2.836144000 | -1.589093000 |
| 7  | 2.012263000  | -1.906374000 | 0.703663000  |
| 7  | 0.365389000  | -4.122851000 | 0.456402000  |
| 6  | 1.537786000  | 0.341889000  | -1.082899000 |
| 6  | -1.727993000 | -4.042894000 | -1.567894000 |
| 6  | -0.214989000 | -0.182006000 | -2.375509000 |

|    |              |               |              |
|----|--------------|---------------|--------------|
| 6  | -1.604098000 | -2.046799000  | -2.578539000 |
| 6  | 2.732434000  | -0.732538000  | 0.622994000  |
| 6  | -0.531520000 | -5.120288000  | 0.135218000  |
| 6  | 2.598160000  | -2.720309000  | 1.649969000  |
| 6  | 1.206590000  | -4.586676000  | 1.446430000  |
| 6  | 1.329898000  | 1.474770000   | -1.981815000 |
| 6  | -2.774377000 | -4.032142000  | -2.588089000 |
| 6  | 0.225725000  | 1.144466000   | -2.799578000 |
| 6  | -2.696444000 | -2.771126000  | -3.221837000 |
| 6  | 3.840167000  | -0.780852000  | 1.573902000  |
| 6  | -0.264690000 | -6.288409000  | 0.970311000  |
| 6  | 3.753870000  | -2.034668000  | 2.220970000  |
| 6  | 0.830986000  | -5.952894000  | 1.798086000  |
| 7  | 2.515122000  | 0.301596000   | -0.183371000 |
| 7  | -1.494025000 | -5.088259000  | -0.780640000 |
| 8  | 1.656132000  | -3.130891000  | -1.609960000 |
| 7  | -1.232603000 | -0.823561000  | -2.938167000 |
| 7  | 2.228328000  | -3.945832000  | 2.006256000  |
| 6  | -0.868920000 | -7.543418000  | 1.041728000  |
| 6  | 1.361556000  | -6.863807000  | 2.714389000  |
| 6  | 0.763332000  | -8.125194000  | 2.806514000  |
| 6  | -0.332598000 | -8.416272000  | 1.982938000  |
| 6  | -3.566255000 | -2.423796000  | -4.254726000 |
| 6  | -3.714673000 | -4.988690000  | -2.976539000 |
| 6  | -4.602722000 | -4.655298000  | -4.005503000 |
| 6  | -4.509574000 | -3.387975000  | -4.595800000 |
| 6  | 1.997965000  | 2.690499000   | -2.122254000 |
| 6  | 1.493468000  | 3.543689000   | -3.098699000 |
| 6  | -0.236206000 | 2.012669000   | -3.790794000 |
| 6  | 0.415732000  | 3.241743000   | -3.941613000 |
| 6  | 4.682047000  | -2.414555000  | 3.190416000  |
| 6  | 5.668238000  | -1.476418000  | 3.478635000  |
| 6  | 4.859300000  | 0.127054000   | 1.869630000  |
| 6  | 5.794583000  | -0.232342000  | 2.846243000  |
| 16 | -1.132273000 | -10.098925000 | 2.169182000  |
| 16 | -5.754552000 | -2.958837000  | -5.926642000 |
| 16 | 2.301328000  | 5.221400000   | -3.293957000 |
| 8  | -5.067963000 | -1.897053000  | -6.979408000 |
| 8  | -6.437181000 | -4.359510000  | -6.460497000 |
| 8  | -1.793603000 | -10.537486000 | 0.727746000  |
| 8  | -0.071643000 | -11.087100000 | 2.951046000  |
| 8  | 8.209197000  | -0.892056000  | 4.633691000  |
| 8  | 7.119633000  | -3.533132000  | 4.849907000  |
| 8  | 3.881270000  | 5.108981000   | -2.848511000 |
| 8  | 1.876527000  | 5.827075000   | -4.765497000 |
| 1  | -5.344520000 | -5.357259000  | -4.369692000 |
| 1  | -3.749792000 | -5.959156000  | -2.495956000 |
| 1  | -3.501402000 | -1.471876000  | -4.768552000 |
| 1  | -1.689705000 | -7.827427000  | 0.393681000  |

|    |              |               |              |
|----|--------------|---------------|--------------|
| 1  | 1.139951000  | -8.887890000  | 3.478872000  |
| 1  | 2.215165000  | -6.600034000  | 3.327384000  |
| 1  | 4.649532000  | -3.384343000  | 3.672862000  |
| 1  | 4.924565000  | 1.075598000   | 1.349998000  |
| 1  | 6.625211000  | 0.413791000   | 3.107306000  |
| 1  | 2.862775000  | 2.948091000   | -1.522236000 |
| 1  | 0.123142000  | 3.953685000   | -4.705266000 |
| 1  | -1.070255000 | 1.736694000   | -4.424955000 |
| 16 | 6.918548000  | -1.900708000  | 4.806330000  |
| 6  | -7.100223000 | -2.006086000  | -4.991745000 |
| 1  | -7.809212000 | -1.679536000  | -5.751171000 |
| 1  | -7.549548000 | -2.704783000  | -4.287776000 |
| 1  | -6.614266000 | -1.166976000  | -4.495622000 |
| 6  | -2.575023000 | -9.786094000  | 3.357432000  |
| 1  | -3.098298000 | -10.737651000 | 3.439237000  |
| 1  | -2.140267000 | -9.476923000  | 4.306665000  |
| 1  | -3.196875000 | -9.012195000  | 2.909682000  |
| 6  | 1.440534000  | 6.289136000   | -1.985879000 |
| 1  | 1.926498000  | 7.262433000   | -2.036104000 |
| 1  | 0.389399000  | 6.343222000   | -2.264856000 |
| 1  | 1.593592000  | 5.802618000   | -1.023502000 |
| 6  | 6.049230000  | -1.417296000  | 6.419125000  |
| 1  | 6.730515000  | -1.707866000  | 7.217505000  |
| 1  | 5.896426000  | -0.339734000  | 6.385497000  |
| 1  | 5.112941000  | -1.972328000  | 6.455848000  |
| 8  | 1.417216000  | -2.725924000  | -3.055502000 |
| 1  | 2.068834000  | -3.322612000  | -3.485586000 |

<sup>2</sup>[(PcS)]-N-(NH<sub>3</sub>)<sub>2</sub>(NH<sub>2</sub>)<sub>2</sub>

|    |              |              |              |
|----|--------------|--------------|--------------|
| 26 | -1.778414000 | -0.982293000 | 2.069019000  |
| 7  | -3.105838000 | -0.186639000 | 0.840327000  |
| 7  | -0.899348000 | 0.772705000  | 2.212246000  |
| 7  | -2.920931000 | -2.574795000 | 2.229266000  |
| 7  | -0.714281000 | -1.616104000 | 3.594463000  |
| 1  | -0.106394000 | 1.000523000  | 2.812015000  |
| 1  | -3.297260000 | 0.740920000  | 1.161249000  |
| 1  | -1.110075000 | 1.597516000  | 1.650391000  |
| 1  | -3.753983000 | -2.775933000 | 1.676123000  |
| 1  | -0.468354000 | -0.938621000 | 4.287670000  |
| 1  | -2.755788000 | -3.373446000 | 2.841870000  |
| 1  | -1.240784000 | -2.437048000 | 3.815475000  |
| 26 | 0.455952000  | -2.358790000 | -0.430282000 |
| 7  | 0.586852000  | -0.619482000 | -1.343958000 |
| 7  | -1.062130000 | -2.836144000 | -1.589093000 |
| 7  | 2.012263000  | -1.906374000 | 0.703663000  |
| 7  | 0.365389000  | -4.122851000 | 0.456402000  |
| 6  | 1.537786000  | 0.341889000  | -1.082899000 |
| 6  | -1.727993000 | -4.042894000 | -1.567894000 |
| 6  | -0.214989000 | -0.182006000 | -2.375509000 |

|    |              |               |              |
|----|--------------|---------------|--------------|
| 6  | -1.604098000 | -2.046799000  | -2.578539000 |
| 6  | 2.732434000  | -0.732538000  | 0.622994000  |
| 6  | -0.531520000 | -5.120288000  | 0.135218000  |
| 6  | 2.598160000  | -2.720309000  | 1.649969000  |
| 6  | 1.206590000  | -4.586676000  | 1.446430000  |
| 6  | 1.329898000  | 1.474770000   | -1.981815000 |
| 6  | -2.774377000 | -4.032142000  | -2.588089000 |
| 6  | 0.225725000  | 1.144466000   | -2.799578000 |
| 6  | -2.696444000 | -2.771126000  | -3.221837000 |
| 6  | 3.840167000  | -0.780852000  | 1.573902000  |
| 6  | -0.264690000 | -6.288409000  | 0.970311000  |
| 6  | 3.753870000  | -2.034668000  | 2.220970000  |
| 6  | 0.830986000  | -5.952894000  | 1.798086000  |
| 7  | -0.740902000 | -1.605783000  | 0.809346000  |
| 7  | 2.515122000  | 0.301596000   | -0.183371000 |
| 7  | -1.494025000 | -5.088259000  | -0.780640000 |
| 1  | -3.850751000 | -0.819007000  | 0.627685000  |
| 7  | -1.232603000 | -0.823561000  | -2.938167000 |
| 7  | 2.228328000  | -3.945832000  | 2.006256000  |
| 6  | -0.868920000 | -7.543418000  | 1.041728000  |
| 6  | 1.361556000  | -6.863807000  | 2.714389000  |
| 6  | 0.763332000  | -8.125194000  | 2.806514000  |
| 6  | -0.332598000 | -8.416272000  | 1.982938000  |
| 6  | -3.566255000 | -2.423796000  | -4.254726000 |
| 6  | -3.714673000 | -4.988690000  | -2.976539000 |
| 6  | -4.602722000 | -4.655298000  | -4.005503000 |
| 6  | -4.509574000 | -3.387975000  | -4.595800000 |
| 6  | 1.997965000  | 2.690499000   | -2.122254000 |
| 6  | 1.493468000  | 3.543689000   | -3.098699000 |
| 6  | -0.236206000 | 2.012669000   | -3.790794000 |
| 6  | 0.415732000  | 3.241743000   | -3.941613000 |
| 6  | 4.682047000  | -2.414555000  | 3.190416000  |
| 6  | 5.668238000  | -1.476418000  | 3.478635000  |
| 6  | 4.859300000  | 0.127054000   | 1.869630000  |
| 6  | 5.794583000  | -0.232342000  | 2.846243000  |
| 16 | -1.132273000 | -10.098925000 | 2.169182000  |
| 16 | -5.754552000 | -2.958837000  | -5.926642000 |
| 16 | 2.301328000  | 5.221400000   | -3.293957000 |
| 8  | -5.067963000 | -1.897053000  | -6.979408000 |
| 8  | -6.437181000 | -4.359510000  | -6.460497000 |
| 8  | -1.793603000 | -10.537486000 | 0.727746000  |
| 8  | -0.071643000 | -11.087100000 | 2.951046000  |
| 8  | 8.209197000  | -0.892056000  | 4.633691000  |
| 8  | 7.119633000  | -3.533132000  | 4.849907000  |
| 8  | 3.881270000  | 5.108981000   | -2.848511000 |
| 8  | 1.876527000  | 5.827075000   | -4.765497000 |
| 1  | -5.344520000 | -5.357259000  | -4.369692000 |
| 1  | -3.749792000 | -5.959156000  | -2.495956000 |
| 1  | -3.501402000 | -1.471876000  | -4.768552000 |

|    |              |               |               |
|----|--------------|---------------|---------------|
| 1  | -1.689705000 | -7.827427000  | 0.393681000   |
| 1  | 1.139951000  | -8.887890000  | 3.478872000   |
| 1  | 2.215165000  | -6.600034000  | 3.327384000   |
| 1  | 4.649532000  | -3.384343000  | 3.672862000   |
| 1  | 4.924565000  | 1.075598000   | 1.349998000   |
| 1  | 6.625211000  | 0.413791000   | 3.107306000   |
| 1  | 2.862775000  | 2.948091000   | -1.522236000  |
| 1  | 0.123142000  | 3.953685000   | -4.705266000  |
| 1  | -1.070255000 | 1.736694000   | -4.424955000  |
| 16 | 6.918548000  | -1.900708000  | 4.806330000   |
| 6  | -7.100223000 | -2.006086000  | -4.991745000  |
| 1  | -7.809212000 | -1.679536000  | -5.751171000  |
| 1  | -7.549548000 | -2.704783000  | -4.287776000  |
| 1  | -6.614266000 | -1.166976000  | -4.495622000  |
| 6  | -2.575023000 | -9.786094000  | 3.357432000   |
| 1  | -3.098298000 | -10.737651000 | 3.439237000   |
| 1  | -2.140267000 | -9.476923000  | 4.306665000   |
| 1  | -3.196875000 | -9.012195000  | 2.909682000   |
| 6  | 1.440534000  | 6.289136000   | -1.985879000  |
| 1  | 1.926498000  | 7.262433000   | -2.036104000S |
| 1  | 0.389399000  | 6.343222000   | -2.264856000  |
| 1  | 1.593592000  | 5.802618000   | -1.023502000  |
| 6  | 6.049230000  | -1.417296000  | 6.419125000   |
| 1  | 6.730515000  | -1.707866000  | 7.217505000   |
| 1  | 5.896426000  | -0.339734000  | 6.385497000   |
| 1  | 5.112941000  | -1.972328000  | 6.455848000   |
| 1  | -2.633395000 | -0.138235000  | -0.039704000  |
| 1  | 0.114623000  | -2.062331000  | 3.257120000   |

<sup>2</sup>[PcS]

|    |              |              |              |
|----|--------------|--------------|--------------|
| 26 | 0.455952000  | -2.358790000 | -0.430282000 |
| 7  | 0.586852000  | -0.619482000 | -1.343958000 |
| 7  | -1.062130000 | -2.836144000 | -1.589093000 |
| 7  | 2.012263000  | -1.906374000 | 0.703663000  |
| 7  | 0.365389000  | -4.122851000 | 0.456402000  |
| 6  | 1.537786000  | 0.341889000  | -1.082899000 |
| 6  | -1.727993000 | -4.042894000 | -1.567894000 |
| 6  | -0.214989000 | -0.182006000 | -2.375509000 |
| 6  | -1.604098000 | -2.046799000 | -2.578539000 |
| 6  | 2.732434000  | -0.732538000 | 0.622994000  |
| 6  | -0.531520000 | -5.120288000 | 0.135218000  |
| 6  | 2.598160000  | -2.720309000 | 1.649969000  |
| 6  | 1.206590000  | -4.586676000 | 1.446430000  |
| 6  | 1.329898000  | 1.474770000  | -1.981815000 |
| 6  | -2.774377000 | -4.032142000 | -2.588089000 |
| 6  | 0.225725000  | 1.144466000  | -2.799578000 |
| 6  | -2.696444000 | -2.771126000 | -3.221837000 |
| 6  | 3.840167000  | -0.780852000 | 1.573902000  |
| 6  | -0.264690000 | -6.288409000 | 0.970311000  |



|    |              |               |              |
|----|--------------|---------------|--------------|
| 6  | 3.753870000  | -2.034668000  | 2.220970000  |
| 6  | 0.830986000  | -5.952894000  | 1.798086000  |
| 7  | 2.515122000  | 0.301596000   | -0.183371000 |
| 7  | -1.494025000 | -5.088259000  | -0.780640000 |
| 7  | -1.232603000 | -0.823561000  | -2.938167000 |
| 7  | 2.228328000  | -3.945832000  | 2.006256000  |
| 6  | -0.868920000 | -7.543418000  | 1.041728000  |
| 6  | 1.361556000  | -6.863807000  | 2.714389000  |
| 6  | 0.763332000  | -8.125194000  | 2.806514000  |
| 6  | -0.332598000 | -8.416272000  | 1.982938000  |
| 6  | -3.566255000 | -2.423796000  | -4.254726000 |
| 6  | -3.714673000 | -4.988690000  | -2.976539000 |
| 6  | -4.602722000 | -4.655298000  | -4.005503000 |
| 6  | -4.509574000 | -3.387975000  | -4.595800000 |
| 6  | 1.997965000  | 2.690499000   | -2.122254000 |
| 6  | 1.493468000  | 3.543689000   | -3.098699000 |
| 6  | -0.236206000 | 2.012669000   | -3.790794000 |
| 6  | 0.415732000  | 3.241743000   | -3.941613000 |
| 6  | 4.682047000  | -2.414555000  | 3.190416000  |
| 6  | 5.668238000  | -1.476418000  | 3.478635000  |
| 6  | 4.859300000  | 0.127054000   | 1.869630000  |
| 6  | 5.794583000  | -0.232342000  | 2.846243000  |
| 16 | -1.132273000 | -10.098925000 | 2.169182000  |
| 16 | -5.754552000 | -2.958837000  | -5.926642000 |
| 16 | 2.301328000  | 5.221400000   | -3.293957000 |
| 8  | -5.067963000 | -1.897053000  | -6.979408000 |
| 8  | -6.437181000 | -4.359510000  | -6.460497000 |
| 8  | -1.793603000 | -10.537486000 | 0.727746000  |
| 8  | -0.071643000 | -11.087100000 | 2.951046000  |
| 8  | 8.209197000  | -0.892056000  | 4.633691000  |
| 8  | 7.119633000  | -3.533132000  | 4.849907000  |
| 8  | 3.881270000  | 5.108981000   | -2.848511000 |
| 8  | 1.876527000  | 5.827075000   | -4.765497000 |
| 1  | -5.344520000 | -5.357259000  | -4.369692000 |
| 1  | -3.749792000 | -5.959156000  | -2.495956000 |
| 1  | -3.501402000 | -1.471876000  | -4.768552000 |
| 1  | -1.689705000 | -7.827427000  | 0.393681000  |
| 1  | 1.139951000  | -8.887890000  | 3.478872000  |
| 1  | 2.215165000  | -6.600034000  | 3.327384000  |
| 1  | 4.649532000  | -3.384343000  | 3.672862000  |
| 1  | 4.924565000  | 1.075598000   | 1.349998000  |
| 1  | 6.625211000  | 0.413791000   | 3.107306000  |
| 1  | 2.862775000  | 2.948091000   | -1.522236000 |
| 1  | 0.123142000  | 3.953685000   | -4.705266000 |
| 1  | -1.070255000 | 1.736694000   | -4.424955000 |
| 16 | 6.918548000  | -1.900708000  | 4.806330000  |
| 6  | -7.100223000 | -2.006086000  | -4.991745000 |
| 1  | -7.809212000 | -1.679536000  | -5.751171000 |
| 1  | -7.549548000 | -2.704783000  | -4.287776000 |

|   |              |               |              |
|---|--------------|---------------|--------------|
| 1 | -6.614266000 | -1.166976000  | -4.495622000 |
| 6 | -2.575023000 | -9.786094000  | 3.357432000  |
| 1 | -3.098298000 | -10.737651000 | 3.439237000  |
| 1 | -2.140267000 | -9.476923000  | 4.306665000  |
| 1 | -3.196875000 | -9.012195000  | 2.909682000  |
| 6 | 1.440534000  | 6.289136000   | -1.985879000 |
| 1 | 1.926498000  | 7.262433000   | -2.036104000 |
| 1 | 0.389399000  | 6.343222000   | -2.264856000 |
| 1 | 1.593592000  | 5.802618000   | -1.023502000 |
| 6 | 6.049230000  | -1.417296000  | 6.419125000  |
| 1 | 6.730515000  | -1.707866000  | 7.217505000  |
| 1 | 5.896426000  | -0.339734000  | 6.385497000  |
| 1 | 5.112941000  | -1.972328000  | 6.455848000  |

<sup>2</sup>[(PcH)FeOOH]-N-(NH<sub>3</sub>)<sub>2</sub>(NH<sub>2</sub>)<sub>2</sub>

|    |              |              |              |
|----|--------------|--------------|--------------|
| 26 | -1.913541000 | -0.873745000 | 2.095995000  |
| 7  | -3.215059000 | -0.341537000 | 0.710473000  |
| 7  | -1.063578000 | 0.900930000  | 1.956185000  |
| 7  | -2.799942000 | -2.635994000 | 2.279593000  |
| 7  | -0.642914000 | -1.398553000 | 3.521379000  |
| 6  | -0.003991000 | 1.336091000  | 2.727177000  |
| 6  | -3.264981000 | 0.879091000  | 0.068913000  |
| 6  | -1.463547000 | 1.928998000  | 1.128513000  |
| 6  | -3.931120000 | -3.027001000 | 1.591182000  |
| 6  | 0.340477000  | -0.579390000 | 4.040702000  |
| 6  | -2.468222000 | -3.624637000 | 3.185521000  |
| 6  | -0.640394000 | -2.588762000 | 4.219755000  |
| 6  | -5.041030000 | -0.358437000 | -0.714924000 |
| 6  | 0.306060000  | 2.720394000  | 2.373728000  |
| 6  | -4.403516000 | 0.894476000  | -0.848277000 |
| 6  | -0.616396000 | 3.095035000  | 1.371372000  |
| 6  | -4.350517000 | -4.344052000 | 2.069522000  |
| 6  | 1.021244000  | -1.279254000 | 5.128298000  |
| 6  | -3.433348000 | -4.716693000 | 3.076978000  |
| 6  | 0.406993000  | -2.546415000 | 5.238333000  |
| 26 | 0.380477000  | -2.216516000 | -0.394076000 |
| 7  | 0.782924000  | -0.523315000 | -1.319549000 |
| 7  | -0.975281000 | -2.616251000 | -1.762721000 |
| 7  | 2.016182000  | -1.986544000 | 0.677520000  |
| 7  | 0.254652000  | -4.073838000 | 0.240320000  |
| 1  | 1.711110000  | -0.637242000 | -1.673796000 |
| 1  | -1.516974000 | -3.477173000 | -1.838756000 |
| 1  | 0.139456000  | -0.442706000 | -2.080766000 |
| 1  | -1.298138000 | -1.978325000 | -2.490192000 |
| 1  | 2.623740000  | -1.167246000 | 0.682546000  |
| 1  | -0.451460000 | -4.513978000 | -0.314371000 |
| 1  | 2.401958000  | -2.662130000 | 1.337187000  |
| 1  | 1.147306000  | -4.474758000 | 0.034329000  |
| 7  | -0.757492000 | -1.532026000 | 0.758318000  |

|   |              |              |              |
|---|--------------|--------------|--------------|
| 7 | 0.643439000  | 0.662988000  | 3.674017000  |
| 7 | -4.597484000 | -2.343192000 | 0.664684000  |
| 6 | -4.269274000 | -1.114707000 | 0.272233000  |
| 7 | -1.470195000 | -3.617807000 | 4.064796000  |
| 7 | -2.458609000 | 1.920488000  | 0.245774000  |
| 6 | -0.613245000 | 4.384046000  | 0.833538000  |
| 6 | 1.259946000  | 3.622214000  | 2.849992000  |
| 6 | 1.266471000  | 4.913553000  | 2.310976000  |
| 6 | 0.336774000  | 5.291742000  | 1.318245000  |
| 6 | -4.900633000 | 1.870483000  | -1.714376000 |
| 6 | -6.060190000 | 1.571831000  | -2.439655000 |
| 6 | -6.705025000 | 0.324962000  | -2.295549000 |
| 6 | -6.199281000 | -0.657215000 | -1.434050000 |
| 6 | -5.425448000 | -5.168930000 | 1.731616000  |
| 6 | -5.572529000 | -6.371887000 | 2.431697000  |
| 6 | -4.663459000 | -6.737649000 | 3.447569000  |
| 6 | -3.578990000 | -5.915565000 | 3.778404000  |
| 6 | 0.813333000  | -3.462751000 | 6.210674000  |
| 6 | 1.841827000  | -3.081837000 | 7.079877000  |
| 6 | 2.447532000  | -1.811062000 | 6.976747000  |
| 6 | 2.046607000  | -0.896443000 | 5.995203000  |
| 1 | -6.690081000 | -1.616727000 | -1.312955000 |
| 1 | -7.620170000 | 0.134015000  | -2.849289000 |
| 1 | -6.475221000 | 2.310492000  | -3.118567000 |
| 1 | -4.401265000 | 2.828177000  | -1.810401000 |
| 1 | -6.123566000 | -4.873757000 | 0.956403000  |
| 1 | -6.401172000 | -7.033023000 | 2.196879000  |
| 1 | -4.823411000 | -7.663212000 | 3.993814000  |
| 1 | -2.878410000 | -6.182969000 | 4.561923000  |
| 1 | 0.336562000  | -4.433399000 | 6.286963000  |
| 1 | 2.176927000  | -3.769515000 | 7.850374000  |
| 1 | 3.222951000  | -1.533768000 | 7.685608000  |
| 1 | 2.500707000  | 0.084656000  | 5.910488000  |
| 1 | 1.966011000  | 3.323703000  | 3.616550000  |
| 1 | 1.993527000  | 5.639187000  | 2.662739000  |
| 1 | 0.349682000  | 6.310237000  | 0.939722000  |
| 1 | -1.335251000 | 4.664859000  | 0.074458000  |
| 8 | -2.987915000 | -0.279086000 | 3.478391000  |
| 8 | -3.861555000 | 0.906314000  | 3.096138000  |
| 1 | -3.984983000 | 1.292540000  | 3.991657000  |
| 1 | -0.032935000 | -4.072033000 | 1.198073000  |
| 1 | 0.655547000  | 0.245696000  | -0.693133000 |

<sup>2</sup>[(PcH)FeOOH]

|    |              |              |             |
|----|--------------|--------------|-------------|
| 26 | -1.913541000 | -0.873745000 | 2.095995000 |
| 7  | -3.215059000 | -0.341537000 | 0.710473000 |
| 7  | -1.063578000 | 0.900930000  | 1.956185000 |
| 7  | -2.799942000 | -2.635994000 | 2.279593000 |
| 7  | -0.642914000 | -1.398553000 | 3.521379000 |

|   |              |              |              |
|---|--------------|--------------|--------------|
| 6 | -0.003991000 | 1.336091000  | 2.727177000  |
| 6 | -3.264981000 | 0.879091000  | 0.068913000  |
| 6 | -1.463547000 | 1.928998000  | 1.128513000  |
| 6 | -3.931120000 | -3.027001000 | 1.591182000  |
| 6 | 0.340477000  | -0.579390000 | 4.040702000  |
| 6 | -2.468222000 | -3.624637000 | 3.185521000  |
| 6 | -0.640394000 | -2.588762000 | 4.219755000  |
| 6 | -5.041030000 | -0.358437000 | -0.714924000 |
| 6 | 0.306060000  | 2.720394000  | 2.373728000  |
| 6 | -4.403516000 | 0.894476000  | -0.848277000 |
| 6 | -0.616396000 | 3.095035000  | 1.371372000  |
| 6 | -4.350517000 | -4.344052000 | 2.069522000  |
| 6 | 1.021244000  | -1.279254000 | 5.128298000  |
| 6 | -3.433348000 | -4.716693000 | 3.076978000  |
| 6 | 0.406993000  | -2.546415000 | 5.238333000  |
| 7 | 0.643439000  | 0.662988000  | 3.674017000  |
| 7 | -4.597484000 | -2.343192000 | 0.664684000  |
| 6 | -4.269274000 | -1.114707000 | 0.272233000  |
| 7 | -1.470195000 | -3.617807000 | 4.064796000  |
| 7 | -2.458609000 | 1.920488000  | 0.245774000  |
| 6 | -0.613245000 | 4.384046000  | 0.833538000  |
| 6 | 1.259946000  | 3.622214000  | 2.849992000  |
| 6 | 1.266471000  | 4.913553000  | 2.310976000  |
| 6 | 0.336774000  | 5.291742000  | 1.318245000  |
| 6 | -4.900633000 | 1.870483000  | -1.714376000 |
| 6 | -6.060190000 | 1.571831000  | -2.439655000 |
| 6 | -6.705025000 | 0.324962000  | -2.295549000 |
| 6 | -6.199281000 | -0.657215000 | -1.434050000 |
| 6 | -5.425448000 | -5.168930000 | 1.731616000  |
| 6 | -5.572529000 | -6.371887000 | 2.431697000  |
| 6 | -4.663459000 | -6.737649000 | 3.447569000  |
| 6 | -3.578990000 | -5.915565000 | 3.778404000  |
| 6 | 0.813333000  | -3.462751000 | 6.210674000  |
| 6 | 1.841827000  | -3.081837000 | 7.079877000  |
| 6 | 2.447532000  | -1.811062000 | 6.976747000  |
| 6 | 2.046607000  | -0.896443000 | 5.995203000  |
| 1 | -6.690081000 | -1.616727000 | -1.312955000 |
| 1 | -7.620170000 | 0.134015000  | -2.849289000 |
| 1 | -6.475221000 | 2.310492000  | -3.118567000 |
| 1 | -4.401265000 | 2.828177000  | -1.810401000 |
| 1 | -6.123566000 | -4.873757000 | 0.956403000  |
| 1 | -6.401172000 | -7.033023000 | 2.196879000  |
| 1 | -4.823411000 | -7.663212000 | 3.993814000  |
| 1 | -2.878410000 | -6.182969000 | 4.561923000  |
| 1 | 0.336562000  | -4.433399000 | 6.286963000  |
| 1 | 2.176927000  | -3.769515000 | 7.850374000  |
| 1 | 3.222951000  | -1.533768000 | 7.685608000  |
| 1 | 2.500707000  | 0.084656000  | 5.910488000  |
| 1 | 1.966011000  | 3.323703000  | 3.616550000  |

|   |              |              |             |
|---|--------------|--------------|-------------|
| 1 | 1.993527000  | 5.639187000  | 2.662739000 |
| 1 | 0.349682000  | 6.310237000  | 0.939722000 |
| 1 | -1.335251000 | 4.664859000  | 0.074458000 |
| 8 | -2.987915000 | -0.279086000 | 3.478391000 |
| 8 | -3.861555000 | 0.906314000  | 3.096138000 |
| 1 | -3.984983000 | 1.292540000  | 3.991657000 |

<sup>2</sup>[PcH]-N-(NH<sub>3</sub>)<sub>2</sub>(NH<sub>2</sub>)<sub>2</sub>

|    |              |              |              |
|----|--------------|--------------|--------------|
| 26 | -1.913541000 | -0.873745000 | 2.095995000  |
| 7  | -3.215059000 | -0.341537000 | 0.710473000  |
| 7  | -1.063578000 | 0.900930000  | 1.956185000  |
| 7  | -2.799942000 | -2.635994000 | 2.279593000  |
| 7  | -0.642914000 | -1.398553000 | 3.521379000  |
| 6  | -0.003991000 | 1.336091000  | 2.727177000  |
| 6  | -3.264981000 | 0.879091000  | 0.068913000  |
| 6  | -1.463547000 | 1.928998000  | 1.128513000  |
| 6  | -3.931120000 | -3.027001000 | 1.591182000  |
| 6  | 0.340477000  | -0.579390000 | 4.040702000  |
| 6  | -2.468222000 | -3.624637000 | 3.185521000  |
| 6  | -0.640394000 | -2.588762000 | 4.219755000  |
| 6  | -5.041030000 | -0.358437000 | -0.714924000 |
| 6  | 0.306060000  | 2.720394000  | 2.373728000  |
| 6  | -4.403516000 | 0.894476000  | -0.848277000 |
| 6  | -0.616396000 | 3.095035000  | 1.371372000  |
| 6  | -4.350517000 | -4.344052000 | 2.069522000  |
| 6  | 1.021244000  | -1.279254000 | 5.128298000  |
| 6  | -3.433348000 | -4.716693000 | 3.076978000  |
| 6  | 0.406993000  | -2.546415000 | 5.238333000  |
| 26 | 0.380477000  | -2.216516000 | -0.394076000 |
| 7  | 0.782924000  | -0.523315000 | -1.319549000 |
| 7  | -0.975281000 | -2.616251000 | -1.762721000 |
| 7  | 2.016182000  | -1.986544000 | 0.677520000  |
| 7  | 0.254652000  | -4.073838000 | 0.240320000  |
| 1  | 1.711110000  | -0.637242000 | -1.673796000 |
| 1  | -1.516974000 | -3.477173000 | -1.838756000 |
| 1  | 0.139456000  | -0.442706000 | -2.080766000 |
| 1  | -1.298138000 | -1.978325000 | -2.490192000 |
| 1  | 2.623740000  | -1.167246000 | 0.682546000  |
| 1  | -0.451460000 | -4.513978000 | -0.314371000 |
| 1  | 2.401958000  | -2.662130000 | 1.337187000  |
| 1  | 1.147306000  | -4.474758000 | 0.034329000  |
| 7  | -0.757492000 | -1.532026000 | 0.758318000  |
| 7  | 0.643439000  | 0.662988000  | 3.674017000  |
| 7  | -4.597484000 | -2.343192000 | 0.664684000  |
| 6  | -4.269274000 | -1.114707000 | 0.272233000  |
| 7  | -1.470195000 | -3.617807000 | 4.064796000  |
| 7  | -2.458609000 | 1.920488000  | 0.245774000  |
| 6  | -0.613245000 | 4.384046000  | 0.833538000  |
| 6  | 1.259946000  | 3.622214000  | 2.849992000  |

|   |              |              |              |
|---|--------------|--------------|--------------|
| 6 | 1.266471000  | 4.913553000  | 2.310976000  |
| 6 | 0.336774000  | 5.291742000  | 1.318245000  |
| 6 | -4.900633000 | 1.870483000  | -1.714376000 |
| 6 | -6.060190000 | 1.571831000  | -2.439655000 |
| 6 | -6.705025000 | 0.324962000  | -2.295549000 |
| 6 | -6.199281000 | -0.657215000 | -1.434050000 |
| 6 | -5.425448000 | -5.168930000 | 1.731616000  |
| 6 | -5.572529000 | -6.371887000 | 2.431697000  |
| 6 | -4.663459000 | -6.737649000 | 3.447569000  |
| 6 | -3.578990000 | -5.915565000 | 3.778404000  |
| 6 | 0.813333000  | -3.462751000 | 6.210674000  |
| 6 | 1.841827000  | -3.081837000 | 7.079877000  |
| 6 | 2.447532000  | -1.811062000 | 6.976747000  |
| 6 | 2.046607000  | -0.896443000 | 5.995203000  |
| 1 | -6.690081000 | -1.616727000 | -1.312955000 |
| 1 | -7.620170000 | 0.134015000  | -2.849289000 |
| 1 | -6.475221000 | 2.310492000  | -3.118567000 |
| 1 | -4.401265000 | 2.828177000  | -1.810401000 |
| 1 | -6.123566000 | -4.873757000 | 0.956403000  |
| 1 | -6.401172000 | -7.033023000 | 2.196879000  |
| 1 | -4.823411000 | -7.663212000 | 3.993814000  |
| 1 | -2.878410000 | -6.182969000 | 4.561923000  |
| 1 | 0.336562000  | -4.433399000 | 6.286963000  |
| 1 | 2.176927000  | -3.769515000 | 7.850374000  |
| 1 | 3.222951000  | -1.533768000 | 7.685608000  |
| 1 | 2.500707000  | 0.084656000  | 5.910488000  |
| 1 | 1.966011000  | 3.323703000  | 3.616550000  |
| 1 | 1.993527000  | 5.639187000  | 2.662739000  |
| 1 | 0.349682000  | 6.310237000  | 0.939722000  |
| 1 | -1.335251000 | 4.664859000  | 0.074458000  |
| 1 | -0.032935000 | -4.072033000 | 1.198073000  |
| 1 | 0.655547000  | 0.245696000  | -0.693133000 |

<sup>2</sup>[PcH]

|    |              |              |              |
|----|--------------|--------------|--------------|
| 26 | -1.913541000 | -0.873745000 | 2.095995000  |
| 7  | -3.215059000 | -0.341537000 | 0.710473000  |
| 7  | -1.063578000 | 0.900930000  | 1.956185000  |
| 7  | -2.799942000 | -2.635994000 | 2.279593000  |
| 7  | -0.642914000 | -1.398553000 | 3.521379000  |
| 6  | -0.003991000 | 1.336091000  | 2.727177000  |
| 6  | -3.264981000 | 0.879091000  | 0.068913000  |
| 6  | -1.463547000 | 1.928998000  | 1.128513000  |
| 6  | -3.931120000 | -3.027001000 | 1.591182000  |
| 6  | 0.340477000  | -0.579390000 | 4.040702000  |
| 6  | -2.468222000 | -3.624637000 | 3.185521000  |
| 6  | -0.640394000 | -2.588762000 | 4.219755000  |
| 6  | -5.041030000 | -0.358437000 | -0.714924000 |
| 6  | 0.306060000  | 2.720394000  | 2.373728000  |
| 6  | -4.403516000 | 0.894476000  | -0.848277000 |

|   |              |              |              |
|---|--------------|--------------|--------------|
| 6 | -0.616396000 | 3.095035000  | 1.371372000  |
| 6 | -4.350517000 | -4.344052000 | 2.069522000  |
| 6 | 1.021244000  | -1.279254000 | 5.128298000  |
| 6 | -3.433348000 | -4.716693000 | 3.076978000  |
| 6 | 0.406993000  | -2.546415000 | 5.238333000  |
| 7 | 0.643439000  | 0.662988000  | 3.674017000  |
| 7 | -4.597484000 | -2.343192000 | 0.664684000  |
| 6 | -4.269274000 | -1.114707000 | 0.272233000  |
| 7 | -1.470195000 | -3.617807000 | 4.064796000  |
| 7 | -2.458609000 | 1.920488000  | 0.245774000  |
| 6 | -0.613245000 | 4.384046000  | 0.833538000  |
| 6 | 1.259946000  | 3.622214000  | 2.849992000  |
| 6 | 1.266471000  | 4.913553000  | 2.310976000  |
| 6 | 0.336774000  | 5.291742000  | 1.318245000  |
| 6 | -4.900633000 | 1.870483000  | -1.714376000 |
| 6 | -6.060190000 | 1.571831000  | -2.439655000 |
| 6 | -6.705025000 | 0.324962000  | -2.295549000 |
| 6 | -6.199281000 | -0.657215000 | -1.434050000 |
| 6 | -5.425448000 | -5.168930000 | 1.731616000  |
| 6 | -5.572529000 | -6.371887000 | 2.431697000  |
| 6 | -4.663459000 | -6.737649000 | 3.447569000  |
| 6 | -3.578990000 | -5.915565000 | 3.778404000  |
| 6 | 0.813333000  | -3.462751000 | 6.210674000  |
| 6 | 1.841827000  | -3.081837000 | 7.079877000  |
| 6 | 2.447532000  | -1.811062000 | 6.976747000  |
| 6 | 2.046607000  | -0.896443000 | 5.995203000  |
| 1 | -6.690081000 | -1.616727000 | -1.312955000 |
| 1 | -7.620170000 | 0.134015000  | -2.849289000 |
| 1 | -6.475221000 | 2.310492000  | -3.118567000 |
| 1 | -4.401265000 | 2.828177000  | -1.810401000 |
| 1 | -6.123566000 | -4.873757000 | 0.956403000  |
| 1 | -6.401172000 | -7.033023000 | 2.196879000  |
| 1 | -4.823411000 | -7.663212000 | 3.993814000  |
| 1 | -2.878410000 | -6.182969000 | 4.561923000  |
| 1 | 0.336562000  | -4.433399000 | 6.286963000  |
| 1 | 2.176927000  | -3.769515000 | 7.850374000  |
| 1 | 3.222951000  | -1.533768000 | 7.685608000  |
| 1 | 2.500707000  | 0.084656000  | 5.910488000  |
| 1 | 1.966011000  | 3.323703000  | 3.616550000  |
| 1 | 1.993527000  | 5.639187000  | 2.662739000  |
| 1 | 0.349682000  | 6.310237000  | 0.939722000  |
| 1 | -1.335251000 | 4.664859000  | 0.074458000  |

<sup>2</sup>[9-OOH]<sub>A</sub><sup>-</sup>

|    |              |              |             |
|----|--------------|--------------|-------------|
| 26 | -1.913541000 | -0.873745000 | 2.095995000 |
| 7  | -3.215059000 | -0.341537000 | 0.710473000 |
| 7  | -1.063578000 | 0.900930000  | 1.956185000 |
| 7  | -2.799942000 | -2.635994000 | 2.279593000 |
| 7  | -0.642914000 | -1.398553000 | 3.521379000 |

|    |              |              |              |
|----|--------------|--------------|--------------|
| 6  | -0.003991000 | 1.336091000  | 2.727177000  |
| 6  | -3.264981000 | 0.879091000  | 0.068913000  |
| 6  | -1.463547000 | 1.928998000  | 1.128513000  |
| 6  | -3.931120000 | -3.027001000 | 1.591182000  |
| 6  | 0.340477000  | -0.579390000 | 4.040702000  |
| 6  | -2.468222000 | -3.624637000 | 3.185521000  |
| 6  | -0.640394000 | -2.588762000 | 4.219755000  |
| 6  | -5.041030000 | -0.358437000 | -0.714924000 |
| 6  | 0.306060000  | 2.720394000  | 2.373728000  |
| 6  | -4.403516000 | 0.894476000  | -0.848277000 |
| 6  | -0.616396000 | 3.095035000  | 1.371372000  |
| 6  | -4.350517000 | -4.344052000 | 2.069522000  |
| 6  | 1.021244000  | -1.279254000 | 5.128298000  |
| 6  | -3.433348000 | -4.716693000 | 3.076978000  |
| 6  | 0.406993000  | -2.546415000 | 5.238333000  |
| 26 | 0.380477000  | -2.216516000 | -0.394076000 |
| 7  | 0.782924000  | -0.523315000 | -1.319549000 |
| 7  | -0.975281000 | -2.616251000 | -1.762721000 |
| 7  | 2.016182000  | -1.986544000 | 0.677520000  |
| 7  | 0.254652000  | -4.073838000 | 0.240320000  |
| 6  | 1.786186000  | 0.371629000  | -0.983666000 |
| 6  | -1.711625000 | -3.786535000 | -1.866078000 |
| 6  | 0.079151000  | 0.010553000  | -2.389067000 |
| 6  | -1.414175000 | -1.749051000 | -2.751649000 |
| 6  | 2.842821000  | -0.871813000 | 0.684358000  |
| 6  | -0.674587000 | -5.017574000 | -0.174102000 |
| 6  | 2.540644000  | -2.905001000 | 1.574335000  |
| 6  | 1.055564000  | -4.665389000 | 1.204978000  |
| 6  | 1.713410000  | 1.536052000  | -1.856987000 |
| 6  | -2.665382000 | -3.670892000 | -2.963425000 |
| 6  | 0.646689000  | 1.305107000  | -2.753094000 |
| 6  | -2.486848000 | -2.381239000 | -3.510875000 |
| 6  | 3.941526000  | -1.079891000 | 1.620357000  |
| 6  | -0.473147000 | -6.257980000 | 0.567224000  |
| 6  | 3.743099000  | -2.356795000 | 2.187675000  |
| 6  | 0.626234000  | -6.040518000 | 1.425786000  |
| 7  | -0.757492000 | -1.532026000 | 0.758318000  |
| 7  | 0.643439000  | 0.662988000  | 3.674017000  |
| 7  | -4.597484000 | -2.343192000 | 0.664684000  |
| 7  | 2.726609000  | 0.219160000  | -0.060578000 |
| 7  | -1.584479000 | -4.884333000 | -1.130138000 |
| 6  | -4.269274000 | -1.114707000 | 0.272233000  |
| 7  | -1.470195000 | -3.617807000 | 4.064796000  |
| 7  | -0.938933000 | -0.543028000 | -3.036135000 |
| 7  | -2.458609000 | 1.920488000  | 0.245774000  |
| 7  | 2.095740000  | -4.127448000 | 1.827642000  |
| 6  | -1.127269000 | -7.491648000 | 0.525009000  |
| 6  | 1.130760000  | -7.053638000 | 2.245416000  |
| 6  | 0.493348000  | -8.297501000 | 2.212340000  |



|    |              |               |              |
|----|--------------|---------------|--------------|
| 6  | -0.620400000 | -8.466367000  | 1.376034000  |
| 6  | -3.256750000 | -1.936149000  | -4.587193000 |
| 6  | -3.594680000 | -4.570935000  | -3.493756000 |
| 6  | -4.371916000 | -4.144648000  | -4.575685000 |
| 6  | -4.193502000 | -2.842983000  | -5.067515000 |
| 6  | 2.481286000  | 2.699851000   | -1.922579000 |
| 6  | 2.118964000  | 3.599637000   | -2.917114000 |
| 6  | 0.332492000  | 2.216658000   | -3.765909000 |
| 6  | 1.092294000  | 3.388571000   | -3.849607000 |
| 6  | 4.634099000  | -2.883477000  | 3.123597000  |
| 6  | 5.708901000  | -2.066911000  | 3.450895000  |
| 6  | 5.051445000  | -0.296314000  | 1.949692000  |
| 6  | 5.957582000  | -0.807807000  | 2.884469000  |
| 6  | -0.613245000 | 4.384046000   | 0.833538000  |
| 6  | 1.259946000  | 3.622214000   | 2.849992000  |
| 6  | 1.266471000  | 4.913553000   | 2.310976000  |
| 6  | 0.336774000  | 5.291742000   | 1.318245000  |
| 6  | -4.900633000 | 1.870483000   | -1.714376000 |
| 6  | -6.060190000 | 1.571831000   | -2.439655000 |
| 6  | -6.705025000 | 0.324962000   | -2.295549000 |
| 6  | -6.199281000 | -0.657215000  | -1.434050000 |
| 6  | -5.425448000 | -5.168930000  | 1.731616000  |
| 6  | -5.572529000 | -6.371887000  | 2.431697000  |
| 6  | -4.663459000 | -6.737649000  | 3.447569000  |
| 6  | -3.578990000 | -5.915565000  | 3.778404000  |
| 6  | 0.813333000  | -3.462751000  | 6.210674000  |
| 6  | 1.841827000  | -3.081837000  | 7.079877000  |
| 6  | 2.447532000  | -1.811062000  | 6.976747000  |
| 6  | 2.046607000  | -0.896443000  | 5.995203000  |
| 16 | -1.487003000 | -10.125273000 | 1.404166000  |
| 16 | -5.299805000 | -2.274538000  | -6.465433000 |
| 16 | 3.069211000  | 5.210691000   | -3.001172000 |
| 16 | 6.911259000  | -2.705756000  | 4.735701000  |
| 8  | -4.643964000 | -0.913286000  | -7.114215000 |
| 8  | -5.664336000 | -3.573921000  | -7.405978000 |
| 8  | -2.467640000 | -10.215613000 | 0.087582000  |
| 8  | -0.367687000 | -11.291136000 | 1.710283000  |
| 8  | 8.399221000  | -2.082046000  | 4.416008000  |
| 8  | 6.685946000  | -4.327903000  | 4.882777000  |
| 8  | 4.450501000  | 5.036061000   | -2.125940000 |
| 8  | 3.114213000  | 5.716145000   | -4.565716000 |
| 1  | -5.086482000 | -4.806964000  | -5.052193000 |
| 1  | -3.700368000 | -5.567490000  | -3.081227000 |
| 1  | -3.136460000 | -0.954900000  | -5.030863000 |
| 1  | -1.966605000 | -7.691146000  | -0.130823000 |
| 1  | 0.859221000  | -9.134303000  | 2.797052000  |
| 1  | 1.994447000  | -6.878427000  | 2.875517000  |
| 1  | 4.513119000  | -3.867269000  | 3.560609000  |
| 1  | 5.207208000  | 0.669424000   | 1.483808000  |

|   |              |               |              |
|---|--------------|---------------|--------------|
| 1 | 6.856709000  | -0.264929000  | 3.154698000  |
| 1 | 3.310167000  | 2.895689000   | -1.252906000 |
| 1 | 0.917597000  | 4.119000000   | -4.632103000 |
| 1 | -0.469797000 | 2.014468000   | -4.465791000 |
| 1 | -6.690081000 | -1.616727000  | -1.312955000 |
| 1 | -7.620170000 | 0.134015000   | -2.849289000 |
| 1 | -6.475221000 | 2.310492000   | -3.118567000 |
| 1 | -4.401265000 | 2.828177000   | -1.810401000 |
| 1 | -6.123566000 | -4.873757000  | 0.956403000  |
| 1 | -6.401172000 | -7.033023000  | 2.196879000  |
| 1 | -4.823411000 | -7.663212000  | 3.993814000  |
| 1 | -2.878410000 | -6.182969000  | 4.561923000  |
| 1 | 0.336562000  | -4.433399000  | 6.286963000  |
| 1 | 2.176927000  | -3.769515000  | 7.850374000  |
| 1 | 3.222951000  | -1.533768000  | 7.685608000  |
| 1 | 2.500707000  | 0.084656000   | 5.910488000  |
| 1 | 1.966011000  | 3.323703000   | 3.616550000  |
| 1 | 1.993527000  | 5.639187000   | 2.662739000  |
| 1 | 0.349682000  | 6.310237000   | 0.939722000  |
| 1 | -1.335251000 | 4.664859000   | 0.074458000  |
| 8 | -2.987915000 | -0.279086000  | 3.478391000  |
| 6 | 1.972721000  | 6.433085000   | -2.061376000 |
| 1 | 2.526366000  | 7.370775000   | -2.047531000 |
| 1 | 1.042083000  | 6.518698000   | -2.620117000 |
| 1 | 1.824141000  | 6.024899000   | -1.062955000 |
| 6 | -6.899286000 | -1.757315000  | -5.596548000 |
| 1 | -7.546793000 | -1.370116000  | -6.381878000 |
| 1 | -7.311975000 | -2.652610000  | -5.134026000 |
| 1 | -6.633086000 | -0.995383000  | -4.865644000 |
| 6 | -2.611120000 | -10.029036000 | 2.923350000  |
| 1 | -3.162210000 | -10.968140000 | 2.938954000  |
| 1 | -1.962761000 | -9.923917000  | 3.791759000  |
| 1 | -3.263237000 | -9.168602000  | 2.782251000  |
| 6 | 6.321722000  | -1.915553000  | 6.351033000  |
| 1 | 6.971744000  | -2.317119000  | 7.126963000  |
| 1 | 6.440616000  | -0.839147000  | 6.238309000  |
| 1 | 5.282331000  | -2.208805000  | 6.488941000  |
| 8 | -3.861555000 | 0.906314000   | 3.096138000  |
| 1 | -3.984983000 | 1.292540000   | 3.991657000  |

<sup>2</sup>[9-OOH]<sub>B</sub><sup>-</sup>

|    |              |              |             |
|----|--------------|--------------|-------------|
| 26 | -1.778414000 | -0.982293000 | 2.069019000 |
| 7  | -3.105838000 | -0.186639000 | 0.840327000 |
| 7  | -0.899348000 | 0.772705000  | 2.212246000 |
| 7  | -2.920931000 | -2.574795000 | 2.229266000 |
| 7  | -0.714281000 | -1.616104000 | 3.594463000 |
| 6  | 0.179436000  | 1.082643000  | 3.028209000 |
| 6  | -3.040165000 | 1.078807000  | 0.277093000 |
| 6  | -1.186164000 | 1.895336000  | 1.447519000 |

|    |              |              |              |
|----|--------------|--------------|--------------|
| 6  | -4.055182000 | -2.848657000 | 1.476128000  |
| 6  | 0.325450000  | -0.931181000 | 4.208807000  |
| 6  | -2.696263000 | -3.661315000 | 3.062679000  |
| 6  | -0.827074000 | -2.853597000 | 4.212874000  |
| 6  | -4.875215000 | 0.049827000  | -0.650979000 |
| 6  | 0.604826000  | 2.455209000  | 2.778387000  |
| 6  | -4.137580000 | 1.252518000  | -0.668456000 |
| 6  | -0.258810000 | 2.968468000  | 1.788013000  |
| 6  | -4.578086000 | -4.160962000 | 1.838836000  |
| 6  | 0.901044000  | -1.759106000 | 5.262606000  |
| 6  | -3.726904000 | -4.669137000 | 2.842260000  |
| 6  | 0.181412000  | -2.972309000 | 5.259404000  |
| 26 | 0.455952000  | -2.358790000 | -0.430282000 |
| 7  | 0.586852000  | -0.619482000 | -1.343958000 |
| 7  | -1.062130000 | -2.836144000 | -1.589093000 |
| 7  | 2.012263000  | -1.906374000 | 0.703663000  |
| 7  | 0.365389000  | -4.122851000 | 0.456402000  |
| 6  | 1.537786000  | 0.341889000  | -1.082899000 |
| 6  | -1.727993000 | -4.042894000 | -1.567894000 |
| 6  | -0.214989000 | -0.182006000 | -2.375509000 |
| 6  | -1.604098000 | -2.046799000 | -2.578539000 |
| 6  | 2.732434000  | -0.732538000 | 0.622994000  |
| 6  | -0.531520000 | -5.120288000 | 0.135218000  |
| 6  | 2.598160000  | -2.720309000 | 1.649969000  |
| 6  | 1.206590000  | -4.586676000 | 1.446430000  |
| 6  | 1.329898000  | 1.474770000  | -1.981815000 |
| 6  | -2.774377000 | -4.032142000 | -2.588089000 |
| 6  | 0.225725000  | 1.144466000  | -2.799578000 |
| 6  | -2.696444000 | -2.771126000 | -3.221837000 |
| 6  | 3.840167000  | -0.780852000 | 1.573902000  |
| 6  | -0.264690000 | -6.288409000 | 0.970311000  |
| 6  | 3.753870000  | -2.034668000 | 2.220970000  |
| 6  | 0.830986000  | -5.952894000 | 1.798086000  |
| 7  | -0.740902000 | -1.605783000 | 0.809346000  |
| 7  | 0.745983000  | 0.299825000  | 3.940031000  |
| 7  | -4.637268000 | -2.057567000 | 0.581918000  |
| 7  | 2.515122000  | 0.301596000  | -0.183371000 |
| 7  | -1.494025000 | -5.088259000 | -0.780640000 |
| 6  | -4.205276000 | -0.833889000 | 0.296828000  |
| 8  | 1.656132000  | -3.130891000 | -1.609960000 |
| 7  | -1.729177000 | -3.796094000 | 3.963257000  |
| 7  | -1.232603000 | -0.823561000 | -2.938167000 |
| 7  | -2.156210000 | 2.032350000  | 0.550570000  |
| 7  | 2.228328000  | -3.945832000 | 2.006256000  |
| 6  | -0.868920000 | -7.543418000 | 1.041728000  |
| 6  | 1.361556000  | -6.863807000 | 2.714389000  |
| 6  | 0.763332000  | -8.125194000 | 2.806514000  |
| 6  | -0.332598000 | -8.416272000 | 1.982938000  |
| 6  | -3.566255000 | -2.423796000 | -4.254726000 |

|    |              |               |              |
|----|--------------|---------------|--------------|
| 6  | -3.714673000 | -4.988690000  | -2.976539000 |
| 6  | -4.602722000 | -4.655298000  | -4.005503000 |
| 6  | -4.509574000 | -3.387975000  | -4.595800000 |
| 6  | 1.997965000  | 2.690499000   | -2.122254000 |
| 6  | 1.493468000  | 3.543689000   | -3.098699000 |
| 6  | -0.236206000 | 2.012669000   | -3.790794000 |
| 6  | 0.415732000  | 3.241743000   | -3.941613000 |
| 6  | 4.682047000  | -2.414555000  | 3.190416000  |
| 6  | 5.668238000  | -1.476418000  | 3.478635000  |
| 6  | 4.859300000  | 0.127054000   | 1.869630000  |
| 6  | 5.794583000  | -0.232342000  | 2.846243000  |
| 6  | -0.139564000 | 4.285449000   | 1.338395000  |
| 6  | 1.615726000  | 3.242679000   | 3.334023000  |
| 6  | 1.742167000  | 4.559128000   | 2.879349000  |
| 6  | 0.871389000  | 5.076254000   | 1.896181000  |
| 6  | -4.522143000 | 2.324002000   | -1.477392000 |
| 6  | -5.665289000 | 2.168095000   | -2.267907000 |
| 6  | -6.409085000 | 0.968861000   | -2.243062000 |
| 6  | -6.021492000 | -0.105102000  | -1.433672000 |
| 6  | -5.689168000 | -4.884574000  | 1.399596000  |
| 6  | -5.933874000 | -6.128025000  | 1.990644000  |
| 6  | -5.088864000 | -6.631409000  | 3.003017000  |
| 6  | -3.973718000 | -5.907312000  | 3.439474000  |
| 6  | 0.475440000  | -3.990108000  | 6.169431000  |
| 6  | 1.504282000  | -3.765906000  | 7.089510000  |
| 6  | 2.215812000  | -2.546960000  | 7.101874000  |
| 6  | 1.923057000  | -1.529541000  | 6.186735000  |
| 16 | -1.132273000 | -10.098925000 | 2.169182000  |
| 16 | -5.754552000 | -2.958837000  | -5.926642000 |
| 16 | 2.301328000  | 5.221400000   | -3.293957000 |
| 8  | -5.067963000 | -1.897053000  | -6.979408000 |
| 8  | -6.437181000 | -4.359510000  | -6.460497000 |
| 8  | -1.793603000 | -10.537486000 | 0.727746000  |
| 8  | -0.071643000 | -11.087100000 | 2.951046000  |
| 8  | 8.209197000  | -0.892056000  | 4.633691000  |
| 8  | 7.119633000  | -3.533132000  | 4.849907000  |
| 8  | 3.881270000  | 5.108981000   | -2.848511000 |
| 8  | 1.876527000  | 5.827075000   | -4.765497000 |
| 1  | -5.344520000 | -5.357259000  | -4.369692000 |
| 1  | -3.749792000 | -5.959156000  | -2.495956000 |
| 1  | -3.501402000 | -1.471876000  | -4.768552000 |
| 1  | -1.689705000 | -7.827427000  | 0.393681000  |
| 1  | 1.139951000  | -8.887890000  | 3.478872000  |
| 1  | 2.215165000  | -6.600034000  | 3.327384000  |
| 1  | 4.649532000  | -3.384343000  | 3.672862000  |
| 1  | 4.924565000  | 1.075598000   | 1.349998000  |
| 1  | 6.625211000  | 0.413791000   | 3.107306000  |
| 1  | 2.862775000  | 2.948091000   | -1.522236000 |
| 1  | 0.123142000  | 3.953685000   | -4.705266000 |

|    |              |               |              |
|----|--------------|---------------|--------------|
| 1  | -1.070255000 | 1.736694000   | -4.424955000 |
| 1  | -6.589207000 | -1.028451000  | -1.400962000 |
| 1  | -7.302036000 | 0.886995000   | -2.856015000 |
| 1  | -5.990234000 | 2.981173000   | -2.909489000 |
| 1  | -3.946875000 | 3.242783000   | -1.486303000 |
| 1  | -6.336404000 | -4.486342000  | 0.626517000  |
| 1  | -6.788833000 | -6.715920000  | 1.671670000  |
| 1  | -5.319415000 | -7.591583000  | 3.455436000  |
| 1  | -3.321841000 | -6.279869000  | 4.221829000  |
| 1  | -0.082443000 | -4.919465000  | 6.156512000  |
| 1  | 1.758994000  | -4.536697000  | 7.810090000  |
| 1  | 2.994341000  | -2.396882000  | 7.844310000  |
| 1  | 2.458011000  | -0.586310000  | 6.192471000  |
| 1  | 2.275734000  | 2.838344000   | 4.093004000  |
| 1  | 2.518486000  | 5.197312000   | 3.289654000  |
| 1  | 0.984981000  | 6.108842000   | 1.578949000  |
| 1  | -0.819091000 | 4.674170000   | 0.588022000  |
| 16 | 6.918548000  | -1.900708000  | 4.806330000  |
| 6  | -7.100223000 | -2.006086000  | -4.991745000 |
| 1  | -7.809212000 | -1.679536000  | -5.751171000 |
| 1  | -7.549548000 | -2.704783000  | -4.287776000 |
| 1  | -6.614266000 | -1.166976000  | -4.495622000 |
| 6  | -2.575023000 | -9.786094000  | 3.357432000  |
| 1  | -3.098298000 | -10.737651000 | 3.439237000  |
| 1  | -2.140267000 | -9.476923000  | 4.306665000  |
| 1  | -3.196875000 | -9.012195000  | 2.909682000  |
| 6  | 1.440534000  | 6.289136000   | -1.985879000 |
| 1  | 1.926498000  | 7.262433000   | -2.036104000 |
| 1  | 0.389399000  | 6.343222000   | -2.264856000 |
| 1  | 1.593592000  | 5.802618000   | -1.023502000 |
| 6  | 6.049230000  | -1.417296000  | 6.419125000  |
| 1  | 6.730515000  | -1.707866000  | 7.217505000  |
| 1  | 5.896426000  | -0.339734000  | 6.385497000  |
| 1  | 5.112941000  | -1.972328000  | 6.455848000  |
| 8  | 1.417216000  | -2.725924000  | -3.055502000 |
| 1  | 2.068834000  | -3.322612000  | -3.485586000 |
